# Supplementary material
Source: PubMed Central journal article supplement (PMC6333890)
Supplement: supp_RA118.006056_141058_2_supp_234128_pd4xmz.pdf [file supp_RA118.006056_141058_2_supp_234128_pd4xmz.pdf]

## SUPPORTING INFORMATION

### Exploring the quinone/inhibitor-binding pocket in mitochondrial respiratory complex I by chemical biology approaches

Shinpei Uno,\* Hironori Kimura,\* Masatoshi Murai, and Hideto Miyoshi

|                                                                  |        |
|------------------------------------------------------------------|--------|
| General synthetic methods and abbreviations                      | p. S1  |
| Syntheses of SF-UQs                                              | P. S2  |
| Syntheses of PC-UQs                                              | P. S11 |
| Syntheses of [ <sup>125</sup> I]PRA3 and [ <sup>125</sup> I]PRA4 | P. S19 |
| Syntheses of [ <sup>125</sup> I]PRA5 and [ <sup>125</sup> I]PRA6 | P. S26 |
| Figure S1                                                        | P. S32 |
| Figure S2                                                        | P. S33 |
| Figure S3                                                        | P. S34 |
| Table S1                                                         | P. S35 |

### **General synthetic methods**

All moisture- and air-sensitive reactions were performed in oven-dried glassware under nitrogen or argon atmosphere with dry solvents under anhydrous conditions using standard syringe septum techniques. <sup>1</sup>H-NMR spectra were recorded at 400 or 500 MHz with Bruker AVANCE III 400 or 500 spectrometers, respectively, using tetramethylsilane (TMS) as the internal standard. <sup>13</sup>C-NMR spectra were recorded at 100 or 125 MHz, respectively. Chemical shifts ( $\delta$ ) were given in ppm relative to TMS with coupling constants ( $J$ ) in Hz. The mass spectra were recorded on a Shimadzu LCMS-8040 with ESI source. Thin-layer chromatography (TLC) was performed on Merck TLC plate Silica-gel 60F254, and the spot was detected by iodine, anis, phosphomolybdic acid, or UV absorbance. Dry solvents were either used as purchased or freshly distilled using common practices where appropriate. HPLC purification was carried out with a Shimadzu LC-10 AS. Elution profiles were monitored at 254 nm with a Shimadzu SPD-10A.

### **Abbreviations**

AcOH, acetic acid; Boc, *tert*-butoxycarbonyl; *t*-BuOK, potassium *tert*-butoxide; *t*-BuOH, *tert*-butylalcohol; chloramine T, sodium *p*-toluenesulfonchloramide; DCC, *N,N'*-dicyclohexylcarbodiimide; DDQ, 2,3-dichloro-5,6-dicyano-*p*-benzoquinone; DMAP, 4-dimethylaminopyridine; DMF, *N,N*-dimethylformamide; DMSO, dimethylsulfoxide; EDC, 1-ethyl-3-(3-dimethylaminopropyl)carbodiimide hydrochloride; Et<sub>2</sub>O, diethyl ether; NIS, *N*-iodosuccinimide; MeOP[N(*i*Pr)<sub>2</sub>]<sub>2</sub>, methyl *N,N,N',N'*-tetraisopropylphosphorodiamidite; MNBA, 2-methyl-6-nitrobenzoic anhydride; MOM, methoxymethyl; MS, molecular sieves; OMe, methoxy; PMB, *p*-methoxybenzyl; PPh<sub>3</sub>, triphenylphosphine; rt, room temperature; (*i*Pr)<sub>2</sub>NH, diisopropylamine; TBAF, tetrabutylammonium fluoride; TBS, *tert*-butyldimethylsilyl; TEA, triethylamine; TfOH, trifluoromethanesulfonic acid; THF, tetrahydrofuran; TLC, thin-layer chromatography; TMEDA, tetramethylethylenediamine; TMS, trimethylsilyl; TsOH, *p*-toluenesulfonic acid.

### Outline of the syntheses of SF-UQ1–SF-UQ5

The synthetic procedures of SF-UQ1, SF-UQ2, and SF-UQ3 are outlined in Scheme S1A. Knoevenagel condensation [1] of 3,5-di-*tert*-butyl-4-hydroxybenzaldehyde with cyanoacetic acid isopropyl ester afforded U1, followed by deprotection. Esterification of U2 with an appropriate UQ analogue (U3–U5, refs 2 and 3) furnished SF-UQ1, SF-UQ2, and SF-UQ3.

SF-UQ4 was synthesized as illustrated in Scheme S1B. Treatment of 2,6-di-*tert*-butylphenol with NIS in the presence of *p*-toluenesulfonic acid gave U6, followed by protection of the phenol by TMS to give U7. Sonogashira-type cross-coupling [4] of alkyne U10, which was prepared from alkyl iodide U8 and Diels-Alder cycloadduct U9 [5], with benzyl iodide U7 gave U11. Cleavage of cyclopentadiene moiety of U11 and deprotection of TMS group furnished SF-UQ4. SF-UQ5 was synthesized by esterification of U4 with 3,5-di-*tert*-butyl-4-hydroxybenzoic acid (Scheme S1C).

Scheme S1<sup>a</sup>

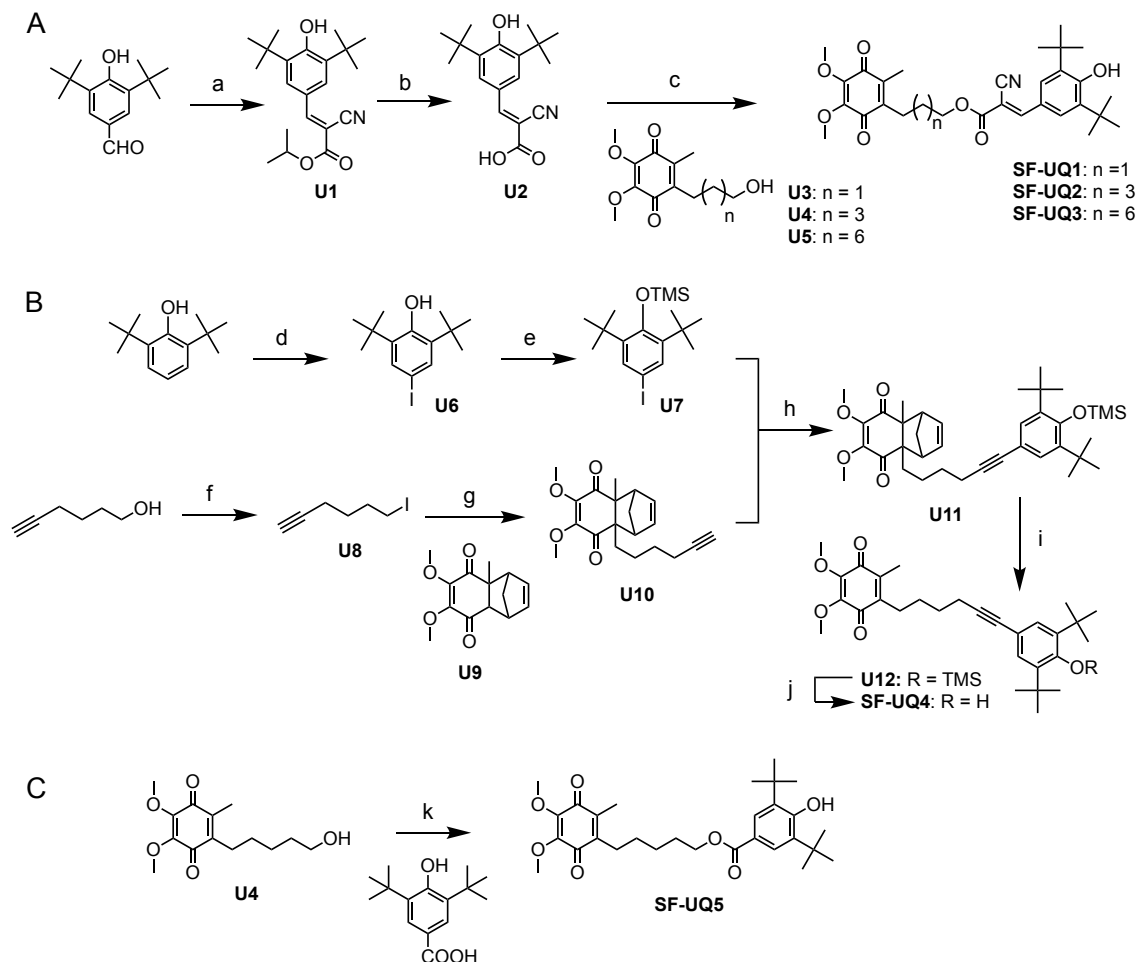

<sup>a</sup>Reagents and conditions: (a) piperidine, AcOH, toluene, reflux, 3 h; (b) 10% aq. NaOH, CH<sub>3</sub>OH, 50°C, 18 h, 79% (2 steps); (c) EDC or 2,4,6-trichlorobenzoyl chloride, DMAP, rt, 4–31 h, 21–67%; (d) NIS, TsOH, CHCl<sub>3</sub>, rt, 17 h, 80%; (e) NaH, TMSCl, DMF, rt, 21 h, 36%; (f) iodine, PPh<sub>3</sub>, imidazole, CH<sub>2</sub>Cl<sub>2</sub>, rt, 1 h, 63%; (g) U9, *t*-BuOK, THF/DMF (1:4), 0°C, 15 h, 65%; (h) PdCl<sub>2</sub>(PPh<sub>3</sub>)<sub>2</sub>, CuI, (*i*Pr)<sub>2</sub>NH, rt, 2 h, 80%; (i) toluene, reflux, 2 h, quant.; (j) TBAF, AcOH, THF, rt, 1 h, quant.; (k) EDC, DMAP, rt, 31 h, 27%.

*Outline of the synthesis of SF-UQ6*

The synthetic procedures of **SF-UQ6** are outlined in Scheme S2. Oxidative homo-coupling [6] of TMS-acetylenes gave di-TMS-diyne **U13**, followed by the treatment with 1.0~1.3 equivalent of MeLi to give mono-TMS-diyne **U14**. Sonogashira-type cross-coupling of diyne **U14** with diiodide **U16** gave **U17**, whose MOM group was deprotected in the presence of HCl to provide **U18**. Knoevenagel condensation of cyanoacetate **U19** with **U18** provided **SF-UQ6**.

**Scheme S2<sup>b</sup>**

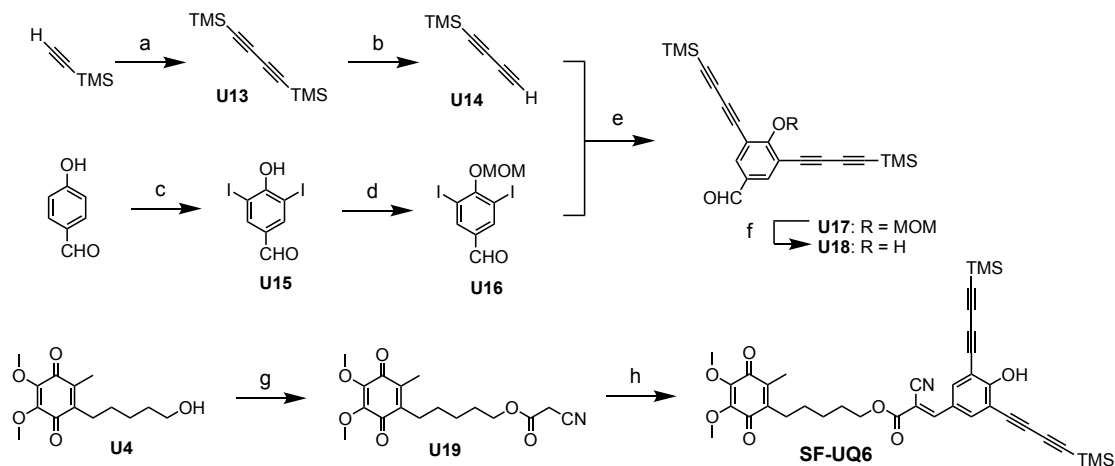

<sup>b</sup>Reagents and conditions: (a) CuCl, TMEDA, acetone, rt, 10 min, 75%; (b) MeLi, Et<sub>2</sub>O, rt; (c) NaIO<sub>4</sub>, NaCl, KI, AcOH/H<sub>2</sub>O (9:1), 50°C, 24 h, 65%; (d) NaH, MOMCl, THF, rt, 30 h, 87%; (e) PdCl<sub>2</sub>(PPh<sub>3</sub>)<sub>2</sub>, CuI, (iPr)<sub>2</sub>NH/THF (1:1), rt, 19 h, 46%; (f) THF/6.0 M aq. HCl (2:1), 50°C, 4.5 h, 67%; (g) cyanoacetic acid, EDC, DMAP, CH<sub>2</sub>Cl<sub>2</sub>, rt, 12 h, 72%; (h) **U18**, piperidine, AcOH, toluene, 70°C, 4 h, 49%.

### Synthesis of **U1**

To a solution of 3,5-di-*tert*-butyl-4-hydroxybenzaldehyde (800 mg, 3.4 mmol) and cyanoacetic acid isopropyl ester (433 mg, 3.4 mmol) in toluene (25 mL), piperidine (30  $\mu$ L) and AcOH (40  $\mu$ L) were added at room temperature, and the mixture was heated under reflux for 3 h. The reaction mixture was cooled to room temperature, quenched with water, extracted with toluene and dried over anhydrous MgSO<sub>4</sub>. The removal of the organic solvent gave **U1**, which was subjected to the next reaction without further purification.

### Synthesis of **U2**

To a solution of crude **U1** in a mixture of methanol (20 mL) and water (10 mL), K<sub>2</sub>CO<sub>3</sub> (940 mg, 6.8 mmol) was added in one portion, and the mixture was stirred for 4 h at room temperature. As the reaction did not proceed completely, 10% (w/v) aqueous NaOH (10 mL) was added, and the mixture was stirred for further 12 h at room temperature. The reaction was quenched with 1.0 M aqueous HCl, and the MeOH was removed *in vacuo*. The mixture was extracted with diethyl ether and dried over anhydrous Na<sub>2</sub>SO<sub>4</sub>. The crude product was purified by silica gel column chromatography (Wako gel<sup>®</sup> C-200, 5% methanol/CHCl<sub>3</sub>) to give **U2** as a white solid (812 mg, 2.7 mmol, 79%, 2 steps); <sup>1</sup>H-NMR (400 MHz, CDCl<sub>3</sub>):  $\delta$  8.24 (s, 1H), 7.96 (s, 2H), 6.01 (s, 1H), 1.49 (s, 18H); <sup>13</sup>C-NMR (100 MHz, CDCl<sub>3</sub>):  $\delta$  168.60, 159.91, 157.89, 137.30 (2C), 130.33 (2C), 123.45, 116.24, 97.30, 34.86 (2C), 30.28 (6C); ESI-MS (*m/z*) 300.2 [M-H]<sup>-</sup>.

### Synthesis of **U3**, **U4**, and **U5**

These compounds were synthesized in 5 steps according to the procedures described in refs. 2 and 3 using commercially available 1,3-propanediol, 1,5-pentanediol, and 1,8-octanediol as a starting material, respectively. **U3**: <sup>1</sup>H-NMR (400 MHz, CDCl<sub>3</sub>):  $\delta$  4.00 (s, 3H), 3.99 (s, 3H), 3.61 (t, 2H, *J* = 6.0 Hz), 2.59 (t, 2H, *J* = 7.4 Hz), 2.05 (s, 3H), 1.69 (tt, 2H, *J* = 6.0, 7.4 Hz); <sup>13</sup>C-NMR (100 MHz, CDCl<sub>3</sub>):  $\delta$  184.88, 184.62, 144.69, 144.45, 142.45, 139.71, 66.03, 61.83, 61.38, 31.54, 22.56, 12.09. **U4**: <sup>1</sup>H-NMR (400 MHz, CDCl<sub>3</sub>):  $\delta$  3.99 (s, 3H), 3.98 (s, 3H), 3.64 (t, 2H, *J* = 6.5 Hz), 2.47 (br t, 2H, *J* = 7.0 Hz), 2.01 (s, 3H), 1.60 (m, 2H), 1.46-1.40 (m, 4H); <sup>13</sup>C-NMR (100 MHz, CDCl<sub>3</sub>):  $\delta$  184.85, 184.36, 144.52 (2C), 142.95, 139.04, 62.94, 61.35 (2C), 32.61, 28.67, 26.50, 26.15, 12.13; ESI-MS (*m/z*): 269.1 [M+H]<sup>+</sup>. **U5**: <sup>1</sup>H-NMR (400 MHz, CDCl<sub>3</sub>):  $\delta$  3.99 (s, 3H), 3.98 (s, 3H), 3.64 (t, *J* = 6.6 Hz, 2H), 2.45 (br t, *J* = 7.3 Hz, 2H), 2.01 (s, 3H), 1.56 (m, 2H), 1.44-1.27 (m, 10H); <sup>13</sup>C-NMR (100 MHz, CDCl<sub>3</sub>):  $\delta$  184.91, 184.37, 144.51 (2C), 143.24, 138.90, 63.21, 61.35 (2C), 32.93, 29.92, 29.49, 29.45, 28.88, 26.57, 25.89, 12.11; ESI-MS (*m/z*) 311.2 [M+H]<sup>+</sup>.

### Synthesis of **SF-UQ1**

To a solution of **U3** (15 mg, 0.063 mmol) and **U2** (21 mg, 0.069 mmol) in anhydrous CH<sub>2</sub>Cl<sub>2</sub> (10 mL), 2,4,6-trichlorobenzoyl chloride (17 mg, 0.069 mmol) and DMAP (23 mg, 0.19 mmol) was added at room temperature

under N<sub>2</sub> atmosphere, and the mixture was stirred for 4 h at room temperature. The reaction was quenched with water, extracted with CH<sub>2</sub>Cl<sub>2</sub>, and dried over anhydrous MgSO<sub>4</sub>. The crude product was purified by silica gel column chromatography (Wako gel<sup>®</sup> C-200, 15–20% ethyl acetate/*n*-hexane) to give **SF-UQ1** as an orange oil (7 mg, 0.013 mmol, 21%); <sup>1</sup>H-NMR (400 MHz, CDCl<sub>3</sub>): δ 8.18 (s, 1H), 7.92 (s, 2H), 5.94 (br s, 1H), 4.32 (t, 2H, *J* = 6.1 Hz), 3.99 (s, 3H), 3.99 (s, 3H), 2.66 (br t, 2H, *J* = 7.7 Hz), 2.07 (s, 3H), 1.95–1.86 (m, 2H), 1.48 (s, 18H); <sup>13</sup>C-NMR (100 MHz, CDCl<sub>3</sub>): δ 184.66, 184.24, 163.61, 159.36, 156.50, 144.68, 144.63, 141.60, 139.96, 137.15 (2C), 129.89 (2C), 123.61, 116.64, 98.05, 65.72, 61.37 (2C), 34.84 (2C), 30.28 (6C), 27.77, 23.28, 12.21; ESI-MS (*m/z*): 522.30 [M-H].

#### *Synthesis of SF-UQ2*

**SF-UQ2** was prepared from **U4** according to the same procedure described for **SF-UQ1**, with the exception that EDC was used for esterification. The crude product was purified by silica gel column chromatography (Wako gel<sup>®</sup> C-200, 5% ethyl acetate/*n*-hexane to CHCl<sub>3</sub>) to give **SF-UQ2** as an orange oil (9 mg, 0.016 mmol, 29%); <sup>1</sup>H-NMR (400 MHz, CDCl<sub>3</sub>): δ 8.16 (s, 1H), 7.91 (s, 2H), 5.92 (br s, 1H), 4.30 (t, 2H, *J* = 6.6 Hz), 3.99 (s, 3H), 3.99 (s, 3H), 2.49 (br t, 2H, *J* = 7.1 Hz), 2.03 (s, 3H), 1.79 (m, 2H), 1.50–1.42 (m, 4H), 1.48 (s, 18H); <sup>13</sup>C-NMR (100 MHz, CDCl<sub>3</sub>): δ 184.84, 184.34, 163.73, 159.21, 156.24, 144.56 (2C), 142.78, 139.15, 137.09 (2C), 129.79 (2C), 123.65, 116.69, 98.45, 66.20, 61.36 (2C), 34.83 (2C), 30.29 (6C), 28.54, 28.47, 26.43, 26.21, 12.19; ESI-MS (*m/z*) 550.3 [M-H].

#### *Synthesis of SF-UQ3*

**SF-UQ3** was prepared from **U5** according to the same procedure described for **SF-UQ1**. The crude product was purified by silica gel column chromatography (Wako gel<sup>®</sup> C-200, 2% CH<sub>3</sub>OH/CHCl<sub>3</sub>) to give **SF-UQ3** as an orange oil (26 mg, 0.044 mmol, 67%); <sup>1</sup>H-NMR (400 MHz, CDCl<sub>3</sub>): δ 8.16 (s, 1H), 7.91 (s, 2H), 5.92 (br s, 1H), 4.29 (t, 2H, *J* = 6.7 Hz), 3.99 (s, 3H), 3.99 (s, 3H), 2.45 (br t, 2H, *J* = 7.2 Hz), 2.01 (s, 3H), 1.80–1.70 (m, 2H), 1.50–1.30 (m, 10H), 1.48 (s, 18H); <sup>13</sup>C-NMR (100 MHz, CDCl<sub>3</sub>): δ 184.90, 184.34, 163.75, 159.16, 156.13, 144.52 (2C), 143.23, 138.89, 137.06 (2C), 129.74 (2C), 123.65, 116.70, 98.56, 66.50, 61.34 (2C), 34.81 (2C), 30.27 (6C), 29.93, 29.41, 29.28, 28.89, 28.73, 26.57, 25.97, 12.11; ESI-MS (*m/z*): 594.4 [M+H]<sup>+</sup>, 592.3 [M-H].

#### *Synthesis of U6*

To an ice-cooled solution of 2,6-di-*tert*-butylphenol (1.0 g, 4.9 mmol) in CHCl<sub>3</sub> (50 mL), *p*-toluenesulfonic acid (911 mg, 5.3 mmol) and NIS (1.2 g, 5.3 mmol) were added, and the mixture was stirred for 17 h at room temperature. The reaction was quenched with saturated aqueous NaHCO<sub>3</sub>, extracted with CHCl<sub>3</sub>, dried over anhydrous MgSO<sub>4</sub>. The crude product was purified by silica gel column chromatography (Wako gel<sup>®</sup> C-200, *n*-hexane) to give **U6** as a yellow solid (1.30 g, 3.9 mmol, 80%); <sup>1</sup>H-NMR (400 MHz, CDCl<sub>3</sub>): δ 7.42 (s, 2H),

5.19 (s, 1H), 1.41 (s, 18H);  $^{13}\text{C}$ -NMR (100 MHz,  $\text{CDCl}_3$ ):  $\delta$  154.01, 138.86 (2C), 134.14 (2C), 83.67, 34.57 (2C), 30.29 (6C).

#### *Synthesis of U7*

To a suspension of NaH (67 mg, 60% in mineral oil, 1.66 mmol) in anhydrous DMF (12 mL), **U6** (500 mg, 1.50 mmol) was added at  $0^\circ\text{C}$  under  $\text{N}_2$  atmosphere. After stirring the mixture at  $0^\circ\text{C}$  for 30 min, TMSCl (180 mg, 1.66 mmol) was added, and the mixture was stirred for 21 h at room temperature. The reaction was quenched with saturated aqueous  $\text{NH}_4\text{Cl}$ , extracted with diethyl ether, and dried over anhydrous  $\text{MgSO}_4$ . The crude product was purified by silica gel column chromatography (Wako gel<sup>®</sup> C-200, 0-2.5% ethyl acetate/*n*-hexane) to give **U7** as a white solid (243 mg, 0.60 mmol, 36%);  $^1\text{H}$ -NMR (400 MHz,  $\text{CDCl}_3$ ):  $\delta$  7.48 (s, 2H), 1.37 (s, 18H), 0.40 (s, 9H);  $^{13}\text{C}$ -NMR (100 MHz,  $\text{CDCl}_3$ ):  $\delta$  153.62, 143.85 (2C), 135.04 (2C), 85.40, 35.35 (2C), 31.24 (6C), 4.09 (3C).

#### *Synthesis of U8*

To a suspension of  $\text{PPh}_3$  (1.7 g, 6.63 mmol) and imidazole (450 mg, 6.63 mmol) in anhydrous  $\text{CH}_2\text{Cl}_2$  (15 mL), iodine (1.67 g, 6.63 mmol) was added at room temperature. After the mixture was stirred for 10 min, a solution of 5-hexyne-1-ol (500 mg, 5.09 mmol) in anhydrous  $\text{CH}_2\text{Cl}_2$  (10 mL) was added dropwise to the mixture, and the mixture was stirred for 1 h at room temperature. The reaction was quenched with saturated aqueous  $\text{Na}_2\text{S}_2\text{O}_3$ , extracted with hexane, and dried over anhydrous  $\text{MgSO}_4$ . The crude product was purified by silica gel column chromatography (Wako gel<sup>®</sup> C-200, 0-5% ethyl acetate/*n*-hexane) to give **U8** as a colorless oil (670 mg, 3.22 mmol, 63%);  $^1\text{H}$ -NMR (400 MHz,  $\text{CDCl}_3$ ):  $\delta$  3.21 (t, 2H,  $J = 6.9$  Hz), 2.23 (dt, 2H,  $J = 2.6, 7.0$  Hz), 1.96 (t, 1H,  $J = 2.7$  Hz), 1.95 (m, 2H), 1.64 (m, 2H);  $^{13}\text{C}$ -NMR (100 MHz,  $\text{CDCl}_3$ ):  $\delta$  83.81, 69.09, 32.44, 29.29, 17.59, 6.22.

#### *Synthesis of U9*

Diels-Alder cycloadduct **U9** was prepared according to the procedure described in ref. 5 using commercially available 2,3-dimethoxy-5-methyl-1,4-benzoquinone and freshly distilled cyclopentadiene;  $^1\text{H}$ -NMR (400 MHz,  $\text{CDCl}_3$ ):  $\delta$  6.16 (m, 1H), 6.02 (m, 1H), 3.94 (s, 3H), 3.93 (s, 3H), 3.43 (s, 1H), 3.09 (s, 1H), 2.84 (d,  $J = 3.1$  Hz, 2H), 1.67 (d,  $J = 7.3$  Hz, 1H), 1.55 (d,  $J = 7.3$  Hz, 1H), 1.49 (s, 3H);  $^{13}\text{C}$ -NMR (100 MHz,  $\text{CDCl}_3$ ):  $\delta$  198.64, 195.05, 150.78, 150.72, 138.34, 134.69, 60.83 (2C), 57.26, 53.59, 52.74, 49.02, 46.52, 26.70; ESI-MS ( $m/z$ ) 249.1  $[\text{M}+\text{H}]^+$ .

#### *Synthesis of U10*

To a solution of **U9** (200 mg, 0.80 mmol) in a mixture of anhydrous THF (5 mL) and DMF (15 mL), potassium

*tert*-butoxide (135 mg, 1.2 mmol) was slowly added at -30°C under N<sub>2</sub> atmosphere. After the mixture was stirred for 10 min at -30°C, **U8** (200 mg, 0.76 mmol) in THF (3 mL) was added, and the mixture was stirred at 0°C for 12 h. The reaction was quenched with saturated aqueous NH<sub>4</sub>Cl, extracted with diethyl ether, and dried over anhydrous MgSO<sub>4</sub>. The crude product was purified by silica gel column chromatography (Wako gel<sup>®</sup> C-200, 5-10% ethyl acetate/*n*-hexane) to give **U10** as a yellow oil (170 mg, 0.52 mmol, 65%); <sup>1</sup>H-NMR (400 MHz, CDCl<sub>3</sub>): δ 6.06 (m, 2H), 3.94 (s, 3H), 3.91 (s, 3H), 3.11 (m, 1H), 3.00 (m, 1H), 2.20 (dt, 2H, *J* = 2.6, 7.0 Hz), 2.00-1.90 (m, 1H), 1.92 (t, 1H, *J* = 2.7 Hz), 1.80-1.72 (m, 2H), 1.58-1.38 (m, 5H), 1.49 (s, 3H); <sup>13</sup>C-NMR (100 MHz, CDCl<sub>3</sub>): δ 198.75, 198.19, 150.58, 149.35, 138.18, 137.30, 84.08, 68.80, 60.36, 60.32, 59.48, 56.32, 54.42, 52.78, 43.45, 36.75, 29.08, 25.39, 23.36, 18.24.

#### Synthesis of **U11**

To a solution of **U7** (70 mg, 0.17 mmol) and **U10** (52 mg, 0.16 mmol) in anhydrous (*i*Pr)<sub>2</sub>NH (8 mL), PdCl<sub>2</sub>(PPh<sub>3</sub>)<sub>2</sub> (5.0 mg, 0.008 mmol) and CuI (3.0 mg, 0.016 mmol) were added under Ar atmosphere, and the mixture was stirred for 2 h at room temperature. The reaction was quenched with saturated aqueous NH<sub>4</sub>Cl, extracted with diethyl ether, and dried over anhydrous MgSO<sub>4</sub>. The crude product was purified by silica gel column chromatography (Wako gel<sup>®</sup> C-200, 15% ethyl acetate/*n*-hexane) to give **U11** as a yellow oil (77 mg, 0.127 mmol, 80%); <sup>1</sup>H-NMR (400 MHz, CDCl<sub>3</sub>): δ 6.06 (m, 2H), 3.89 (s, 3H), 3.86 (s, 3H), 3.12 (br s, 1H), 3.00 (br s, 1H), 2.40 (t, 2H, *J* = 6.8 Hz), 2.05-1.95 (m, 1H), 1.85-1.75 (m, 2H), 1.53 (s, 3H), 1.65-1.40 (m, 5H), 1.38 (s, 18H), 0.39 (s, 9H); <sup>13</sup>C-NMR (100 MHz, CDCl<sub>3</sub>): δ 198.88, 198.35, 153.42, 150.71, 149.42, 141.19 (2C), 138.32, 137.38, 129.31 (2C), 115.62, 87.50, 81.99, 60.37 (2C), 59.65, 56.43, 54.46, 52.86, 43.53, 36.98, 35.26 (2C), 31.33 (6C), 29.61, 25.71, 23.49, 19.34, 4.01 (3C).

#### Synthesis of **U12**

**U11** (77 mg, 0.127 mmol) was dissolved in toluene (10 mL), and the solution was heated under reflux for 2 h. Then the solvent was removed under reduced pressure. The crude product was purified by silica gel column chromatography (Wako gel<sup>®</sup> C-200, 10% ethyl acetate/*n*-hexane) to give **U12** as an orange oil (50 mg, 0.093 mmol, 73%); <sup>1</sup>H-NMR (400 MHz, CDCl<sub>3</sub>): δ 7.28 (s, 2H), 3.988 (s, 3H), 3.986 (s, 3H), 2.52 (brt, 2H, *J* = 7.6 Hz), 2.44 (t, 2H, *J* = 6.8 Hz), 2.04 (s, 3H), 1.70-1.65 (m, 4H), 1.38 (s, 18H), 0.39 (s, 9H); <sup>13</sup>C-NMR (100 MHz, CDCl<sub>3</sub>): δ 184.85, 184.30, 153.43, 144.55 (2C), 142.90, 141.18 (2C), 139.16, 129.40 (2C), 115.70, 87.50, 81.92, 61.36 (2C), 35.28 (2C), 31.34 (6C), 29.01, 28.06, 26.04, 19.39, 12.18, 4.04 (3C).

#### Synthesis of **SF-UQ4**

To an ice-cooled solution of **U12** (6 mg, 0.011 mmol) in THF (3 mL), AcOH (10 μL) and TBAF (22 μL, 1.0 M solution in THF, 0.022 mmol) were added at 0°C and the mixture was stirred for 1 h at room temperature.



Then the reaction mixture was quenched with saturated aqueous  $\text{NH}_4\text{Cl}$  at  $0^\circ\text{C}$ , extracted with diethyl ether, and dried over anhydrous  $\text{MgSO}_4$ . The crude product was purified by silica gel column chromatography (Wako gel<sup>®</sup> C-200, 10% ethyl acetate/*n*-hexane) to give **SF-UQ4** as an orange oil (5.0 mg, 0.011 mmol, quant.);  $^1\text{H-NMR}$  (400 MHz,  $\text{CDCl}_3$ ):  $\delta$  7.20 (s, 2H), 5.28 (s, 1H), 3.987 (s, 3H), 3.985 (s, 3H), 2.52 (t, 2H,  $J = 7.6$  Hz), 2.43 (t, 2H,  $J = 6.8$  Hz), 2.04 (s, 3H), 1.70-1.55 (m, 4H), 1.42 (s, 18H);  $^{13}\text{C-NMR}$  (100 MHz,  $\text{CDCl}_3$ ):  $\delta$  184.86, 184.30, 153.99, 144.59, 144.55, 142.91, 139.16, 136.15 (2C), 128.65 (2C), 114.85, 86.97, 82.06, 61.36 (2C), 34.48 (2C), 30.39 (6C), 29.03, 28.05, 26.04, 19.37, 12.18; ESI-MS ( $m/z$ ) 467.3  $[\text{M}+\text{H}]^+$ , 465.3  $[\text{M}-\text{H}]^-$ .

#### *Synthesis of SF-UQ5*

To a solution of **U4** (16 mg, 0.060 mmol) and 3,5-di-*tert*-butyl-4-hydroxybenzoic acid (17 mg, 0.066 mmol), EDC (13 mg, 0.066 mmol) and DMAP (8 mg, 0.066 mmol) were added, and the mixture was stirred for 31 h at room temperature. The reaction was quenched with water, extracted with  $\text{CH}_2\text{Cl}_2$ , and dried over anhydrous  $\text{MgSO}_4$ . The crude product was purified by silica gel column chromatography (Wako gel<sup>®</sup> C-200, 20% ethyl acetate/*n*-hexane) to provide **SF-UQ5** as an orange oil (8 mg, 0.016 mmol, 27%);  $^1\text{H-NMR}$  (400 MHz,  $\text{CDCl}_3$ ):  $\delta$  7.89 (s, 2H), 5.66 (s, 1H), 4.28 (t, 2H,  $J = 6.6$  Hz), 3.99 (s, 3H), 3.99 (s, 3H), 2.48 (br t, 2H,  $J = 7.2$  Hz), 2.01 (s, 3H), 1.82-1.75 (m, 2H), 1.50-1.44 (m, 4H), 1.44 (s, 18H);  $^{13}\text{C-NMR}$  (100 MHz,  $\text{CDCl}_3$ ):  $\delta$  184.83, 184.32, 167.36, 158.31, 144.55 (2C), 142.89, 139.06, 135.90 (2C), 127.20 (2C), 121.63, 61.36 (2C), 34.54 (2C), 30.36 (6C), 28.87, 28.61, 26.55, 12.15; ESI-MS ( $m/z$ ) 501.4  $[\text{M}+\text{H}]^+$ , 499.3  $[\text{M}-\text{H}]^-$ .

#### *Synthesis of U13*

To a suspension of  $\text{CuCl}$  (99 mg, 1.0 mmol) in acetone (5 mL), TMEDA (35 mg, 0.30 mmol) was added at room temperature. After the mixture was stirred for 30 min at room temperature, the mixture was poured in a separate funnel. Then, trimethylsilylacetylene (1.0 g, 10 mmol) was added, and the mixture was shaken until the solution became blue. After the solvent was removed under reduced pressure, water was added to the residue, and the mixture was extracted with hexane, and dried over anhydrous  $\text{MgSO}_4$ . The crude product was purified by silica gel column chromatography (Wako gel<sup>®</sup> C-200, *n*-hexane) to provide **U13** as a white solid (744 mg, 3.83 mmol, 75%);  $^1\text{H-NMR}$  (400 MHz,  $\text{CDCl}_3$ ):  $\delta$  0.19 (s, 18H);  $^{13}\text{C-NMR}$  (100 MHz,  $\text{CDCl}_3$ ):  $\delta$  88.20 (2C), 86.19 (2C), -0.28 (6C).

#### *Synthesis of U14*

To a solution of **U13** (1.18 g, 6.07 mmol) in anhydrous diethyl ether (25 mL), MeLi (6.1 mL, 1.1 M solution in diethyl ether, 6.70 mmol) was added at  $-78^\circ\text{C}$  under  $\text{N}_2$  atmosphere. After stirring the mixture for 10 h at room temperature, the reaction was quenched with saturated aqueous  $\text{NH}_4\text{Cl}$ , extracted with diethyl ether, and dried over anhydrous  $\text{MgSO}_4$ . The removal of the organic solvent gave the crude **U14** as a mixture of **U13**,

which was subjected to the next reaction without further purification;  $^1\text{H-NMR}$  (400 MHz,  $\text{CDCl}_3$ ):  $\delta$  2.11 (s, 1H), 0.21 (s, 9H). \*As the boiling point of **U14** is expected to low (below  $120^\circ\text{C}$ ), the solvent should be carefully removed by rotary evaporator (over 70 mmHg, at  $30^\circ\text{C}$ ). The ratio of **U13** and **U14** was estimated to be 1: 5 by  $^1\text{H-NMR}$ .

#### *Synthesis of U15*

To a solution of 4-hydroxybenzaldehyde (1.0 g, 8.20 mmol) in a mixture of AcOH (18 mL) and water (2 mL),  $\text{NaIO}_4$  (1.75 g, 8.20 mmol), NaCl (958 mg, 16.4 mmol), and KI (1.36 g, 8.20 mmol) were added at room temperature, and the mixture was stirred for 1 h at  $50^\circ\text{C}$ . After stirring for a further 40 h at room temperature, the reaction was quenched with ice water to form precipitate. The precipitate was filtered off, washed with water and dried in a desiccator to give **U15** as a white solid (2.00 g, 5.35 mmol, 65%);  $^1\text{H-NMR}$  (400 MHz,  $\text{CDCl}_3$ ):  $\delta$  9.74 (s, 1H), 8.20 (s, 2H), 6.27 (br s, 1H);  $^{13}\text{C-NMR}$  (100 MHz,  $\text{CDCl}_3$ ):  $\delta$  187.86, 158.55, 141.24 (2C), 133.08, 82.88 (2C); ESI-MS ( $m/z$ ): 372.8 [M-H].

#### *Synthesis of U16*

To a suspension of NaH (93 mg, 60% in mineral oil, 2.31 mmol) in anhydrous THF (30 mL), **U15** (865 mg, 2.31 mmol) was added at room temperature under  $\text{N}_2$  atmosphere. After the mixture was stirred for 30 min at room temperature, chloromethyl methyl ether (188 mg, 2.33 mmol) was added, and the mixture was stirred for 20 h at room temperature. The reaction was quenched with saturated aqueous  $\text{NH}_4\text{Cl}$ , extracted with diethyl ether, and dried over anhydrous  $\text{MgSO}_4$ . The crude product was purified by silica gel column chromatography (Wako gel<sup>®</sup> C-200, 20% ethyl acetate/*n*-hexane) to provide **U16** as a white solid (784 mg, 1.88 mmol, 81%);  $^1\text{H-NMR}$  (400 MHz,  $\text{CDCl}_3$ ):  $\delta$  9.81 (s, 1H), 8.29 (s, 2H), 5.23 (s, 2H), 3.76 (s, 3H);  $^{13}\text{C-NMR}$  (100 MHz,  $\text{CDCl}_3$ ):  $\delta$  188.25, 161.77, 141.60 (2C), 135.57, 100.85, 92.15 (2C), 59.29.

#### *Synthesis of U17*

To a solution of **U16** (652 mg, 1.56 mmol) and **U14** (1.01 g, 4.7 mmol) in a mixture of anhydrous THF (10 mL) and (*i*Pr) $_2\text{NH}$  (15 mL),  $\text{PdCl}_2(\text{PPh}_3)_2$  (56 mg, 0.08 mmol) and CuI (15 mg, 0.08 mmol) were added at room temperature under Ar atmosphere. After stirring for 19 h at room temperature, the reaction was quenched with saturated aqueous  $\text{NH}_4\text{Cl}$ , extracted with diethyl ether, and dried over anhydrous  $\text{MgSO}_4$ . The crude product was purified by silica gel column chromatography (Wako gel<sup>®</sup> C-200, 2.5% ethyl acetate/*n*-hexane) to provide **U17** as a brown solid (295 mg, 0.73 mmol, 46%);  $^1\text{H-NMR}$  (400 MHz,  $\text{CDCl}_3$ ):  $\delta$  9.84 (s, 1H), 7.94 (s, 2H), 5.49 (s, 2H), 3.66 (s, 3H), 0.23 (s, 18H);  $^{13}\text{C-NMR}$  (100 MHz,  $\text{CDCl}_3$ ):  $\delta$  189.11, 165.98, 136.70 (2C), 132.21, 117.43 (2C), 99.73, 93.45 (2C), 87.32 (2C), 80.08 (2C), 71.07 (2C), 58.19, -0.28 (6C).

### Synthesis of **U18**

To a solution of **U17** (295 mg, 0.73 mmol) in THF (10 mL), 6.0 M HCl (5 mL) was added at room temperature, and the mixture was stirred for 4 h at 50 °C. Then, the mixture was cooled to room temperature, extracted with diethyl ether, and dried over anhydrous MgSO<sub>4</sub>. The crude product was purified by silica gel column chromatography (Wako gel<sup>®</sup> C-200, 5% ethyl acetate/*n*-hexane) to give **18** as a brown solid (210 mg, 0.58 mmol, 79%); <sup>1</sup>H-NMR (400 MHz, CDCl<sub>3</sub>): δ 9.79 (s, 1H), 7.91 (s, 2H), 0.25 (s, 18H); <sup>13</sup>C-NMR (100 MHz, CDCl<sub>3</sub>): δ 188.99, 164.57, 136.21 (2C), 130.04, 110.32 (2C), 94.27 (2C), 87.00 (2C), 81.57 (2C), 69.21 (2C), -0.30 (6C); ESI-MS (*m/z*): 361.2 [M-H]<sup>+</sup>.

### Synthesis of **U19**

To a solution of **U4** (30 mg, 0.11 mmol) and cyanoacetic acid (12 mg, 0.14 mmol) in CH<sub>2</sub>Cl<sub>2</sub> (8 mL), EDC (32 mg, 0.17 mmol) and DMAP (20 mg, 0.17 mmol) were added at room temperature, and the mixture was stirred for 11 h at room temperature. The reaction was quenched with water, extracted with CH<sub>2</sub>Cl<sub>2</sub>, and dried over anhydrous MgSO<sub>4</sub>. The crude product was purified by silica gel column chromatography (Wako gel<sup>®</sup> C-200, 30% ethyl acetate/*n*-hexane) to give **U19** as an orange oil (27 mg, 0.081 mmol, 72%); <sup>1</sup>H-NMR (400 MHz, CDCl<sub>3</sub>): δ 4.19 (t, 2H, *J* = 6.6 Hz), 3.98 (s, 3H), 3.97 (s, 3H), 3.46 (s, 2H), 2.45 (br t, 2H, *J* = 6.8 Hz), 2.00 (s, 3H), 1.69 (m, 2H), 1.43 – 1.45 (m, 4H); <sup>13</sup>C-NMR (100 MHz, CDCl<sub>3</sub>): δ 184.76, 184.31, 163.13, 144.51 (2C), 142.58, 139.16, 113.19, 66.92, 61.35 (2C), 28.30, 28.22, 26.28, 26.04, 24.90, 12.14; ESI-MS (*m/z*): 336.2 [M+H]<sup>+</sup>.

### Synthesis of **SF-UQ6**

To a solution of **U18** (33 mg, 0.090 mmol) and **U19** (27 mg, 0.081 mmol) in toluene (7 mL), piperidine (8 μL) and AcOH (5 μL) were added at room temperature. After stirring for 2 h at 70 °C, piperidine (8 μL) was added again to the mixture, which was stirred for a further 2 h at 70 °C. The mixture was cooled to room temperature, quenched with saturated aqueous NH<sub>4</sub>Cl, extracted with ethyl acetate, and dried over anhydrous MgSO<sub>4</sub>. The crude product was purified by silica gel column chromatography (Wako gel<sup>®</sup> C-200, 20% ethyl acetate/*n*-hexane) to give **SF-UQ6** as an orange oil (27 mg, 0.040 mmol, 49%); <sup>1</sup>H-NMR (400 MHz, CDCl<sub>3</sub>): δ 8.04 (s, 2H), 8.01 (s, 1H), 4.31 (t, 2H, *J* = 6.6 Hz), 2.49 (t, 2H, *J* = 6.6 Hz), 2.03 (s, 3H), 1.79 (m, 2H), 1.50-1.46 (m, 4H), 0.25 (s, 18H); <sup>13</sup>C-NMR (100 MHz, CDCl<sub>3</sub>): δ 184.82, 184.34, 163.52, 162.54, 152.07, 144.56 (2C), 142.70, 139.19, 137.31 (2C), 124.78, 115.28, 110.73 (2C), 102.46, 94.38 (2C), 86.99 (2C), 81.76 (2C), 68.99 (2C), 66.73, 61.36 (2C), 28.42, 28.39, 26.37, 26.13, 12.19, -0.35 (6C); ESI-MS (*m/z*): 678.2 [M-H]<sup>+</sup>.

### Outline of the syntheses of PC-UQ1–PC-UQ4

The synthetic procedures of PC-UQ1, PC-UQ2, PC-UQ3 and PC-UQ4 are outlined in Scheme S3. (*S*)-(+)-2,2-dimethyl-1,3-dioxolane-4-methanol was protected with PMB group, followed by the removal of acetal, esterification of *sn*-1 position of U21 with oleic acid to provide monoacylglycerol U22. The free hydroxy group at *sn*-2 position in U22 was protected with TBS group, then the PMB group was removed in the presence of DDQ to give U24. U25 was prepared by phosphoramidite methodology using choline tosylate, followed by the cleavage of the methyl and TBS groups to provide U26. The *lyso*-PC U26 was treated with appropriate UQ intermediate (U28-U30 and U35 [7]) in the presence of 2-methyl-6-nitrobenzoic anhydride or 2,4,6-trichlorobenzoyl chloride to afford the target compounds.

### Scheme S3<sup>c</sup>

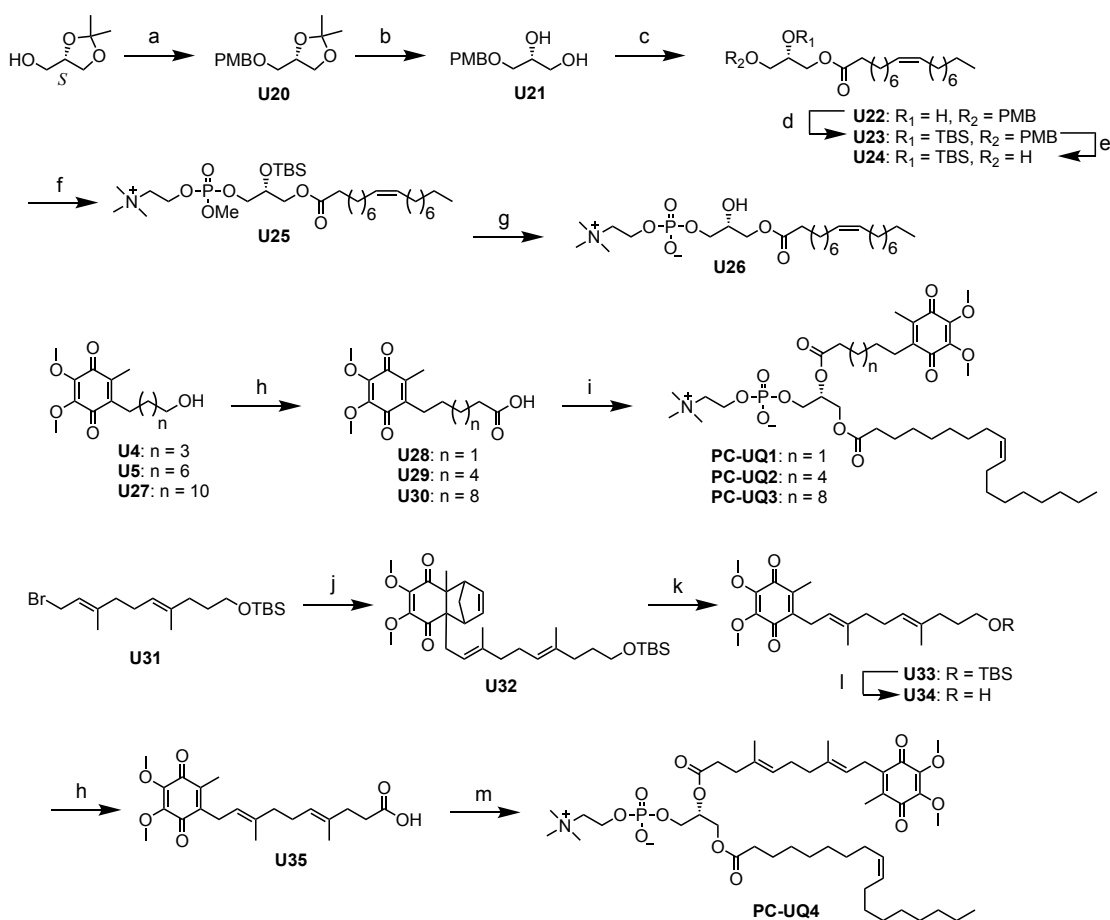

<sup>c</sup>Reagents and conditions: (a) PMBCl, NaH, DMF, rt, 3 h, 84%; (b) AcOH/water (6:1), 50 °C, 2 h, 85%; (c) oleic acid, DCC, DMAP, CH<sub>2</sub>Cl<sub>2</sub>, rt, 2 h, 57%; (d) TBSCl, imidazole, neat, rt, 16 h, quant.; (e) DDQ, CH<sub>2</sub>Cl<sub>2</sub>/water (9:1), 0 °C, 2 h, 77%; (f) i) MeOP[N(*i*Pr)<sub>2</sub>]<sub>2</sub>, *1H*-tetrazole, MS4A, CH<sub>2</sub>Cl<sub>2</sub>, rt, 2 h; ii) choline tosylate, *1H*-tetrazole, rt, 2 h, iii) Bu<sub>4</sub>NIO<sub>4</sub>, 0 °C, 30 min, 77% (3 steps); (g) i) TMA, CH<sub>2</sub>Cl<sub>2</sub>, CH<sub>3</sub>CN, *i*PrOH, rt, 12 h; ii) aq. HCl, THF, rt, 12 h, 84% (2 steps); (h) Jone's reagents, acetone, rt, 2 h, 64–92% (i) U26, MNBA, DMAP, rt, 3–20 h, 36–68%; (j) U9, *t*-BuOK, DMF/THF (1:3), 0 °C, 12 h, 53%; (k) toluene, reflux, 5 h, quant.; (l) THF/1.0 M aq. HCl (4:1), rt, 1 h, 90%; (m) U26, 2,4,6-trichlorobenzoyl chloride, DMAP, rt, 16 h, 21%.

### *Synthesis of U20*

To a suspension of NaH (2.64 g, 60% in mineral oil, 66 mmol) in anhydrous DMF (100 mL), (*S*)-(+)-2,2-dimethyl-1,3-dioxolane-4-methanol (8.0 g, 60.5 mmol) was added at 0°C under N<sub>2</sub> atmosphere. After stirring for 30 min, *p*-methoxybenzyl chloride (10.3 g, 66 mmol) was added to the mixture, followed by the stirring for 3 h at room temperature. The reaction was quenched with water, extracted with 10% ethyl acetate/*n*-hexane, washed with brine and dried over anhydrous MgSO<sub>4</sub>. The crude product was purified by silica gel column chromatography (Wako gel<sup>®</sup> C-200, 10–15% ethyl acetate/*n*-hexane) to provide **U20** as a colorless oil (12.8 g, 50.8 mmol, 84%); <sup>1</sup>H-NMR (400 MHz, CDCl<sub>3</sub>): δ 7.26 (d, 2H, *J* = 8.7 Hz), 6.88 (d, 2H, *J* = 8.6 Hz), 4.52 (dd, 2H, *J* = 19.2, 11.7 Hz), 4.28 (tt, 1H, *J* = 12.0, 6.0 Hz), 4.05 (dd, 1H, *J* = 8.2, 6.4 Hz), 3.81 (s, 3H), 3.63 (dd, 1H, *J* = 8.2, 6.4 Hz), 3.53 (dd, 1H, *J* = 8.8, 5.7 Hz), 3.44 (dd, 1H, *J* = 9.8, 5.6 Hz), 1.42 (s, 3H), 1.36 (s, 3H); <sup>13</sup>C-NMR (100 MHz, CDCl<sub>3</sub>): δ 159.30, 130.08, 129.38 (2C), 113.82 (2C), 109.38, 74.77, 73.18, 70.81, 66.96, 55.28, 26.79, 25.39.

### *Synthesis of U21*

**U20** (12.8 mg, 50.8 mmol) was dissolved in a mixture of AcOH (150 mL) and water (25 mL), then the mixture was heated to 50°C and stirred for 2 h. The solvent was removed under reduced pressure, and the crude product was purified by silica gel column chromatography (Wako gel<sup>®</sup> C-200, 40–100% ethyl acetate/*n*-hexane) to give **U21** as a white solid (11.1 g, 41.8 mmol, 82%); <sup>1</sup>H-NMR (400 MHz, CDCl<sub>3</sub>): δ 7.25 (d, 2H, *J* = 8.8 Hz), 6.89 (d, 2H, *J* = 8.7 Hz), 4.47 (s, 2H), 3.88 (m, 1H), 3.80 (s, 3H), 3.69 (dd, 1H, *J* = 11.4, 3.9 Hz), 3.62 (dd, 1H, *J* = 11.4, 5.5 Hz), 3.55 (dd, 1H, *J* = 9.6, 4.4 Hz), 3.51 (dd, 1H, *J* = 9.6, 6.2 Hz), 2.72 (s, 1H), 2.29 (s, 1H); <sup>13</sup>C-NMR (100 MHz, CDCl<sub>3</sub>): δ 159.36, 129.78, 129.48 (2C), 113.80 (2C), 73.20, 71.43, 70.72, 64.05, 55.27.

### *Synthesis of U22*

To an ice-cooled solution of **U21** (2.00 g, 9.42 mmol) and oleic acid (1.27 g, 4.49 mmol) in anhydrous CH<sub>2</sub>Cl<sub>2</sub> (50 mL), DCC (930 mg, 4.50 mmol) and DMAP (550 mg, 4.50 mmol) were added under N<sub>2</sub> atmosphere. After stirring for 2 h at room temperature, the reaction mixture was filtered, and the filtrate was concentrated under reduced pressure. The crude product was purified by silica gel column chromatography (Wako gel<sup>®</sup> C-200, 30% ethyl acetate/*n*-hexane) to give **U22** as a colorless oil (1.22 g, 2.56 mmol, 57%); <sup>1</sup>H-NMR (400 MHz, CDCl<sub>3</sub>): δ 7.25 (d, 2H, *J* = 8.7 Hz), 6.88 (d, 2H, *J* = 8.7 Hz), 5.39-5.30 (m, 2H), 4.49 (s, 2H), 4.17 (dd, 1H, *J* = 4.5, 11.5 Hz), 4.12 (dd, 1H, *J* = 5.9, 11.6 Hz), 4.05-3.97 (m, 1H), 3.81 (s, 3H), 3.52 (dd, 1H, *J* = 4.3, 8.4 Hz), 3.46 (dd, 1H, *J* = 6.2, 9.6 Hz), 2.49 (d, 1H, *J* = 4.8 Hz), 2.32 (t, 2H, *J* = 7.6 Hz), 2.05-1.98 (m, 4H), 1.63-1.59 (m, 2H), 1.38-1.22 (m, 20H), 0.88 (t, 3H, *J* = 6.9 Hz); <sup>13</sup>C-NMR (100 MHz, CDCl<sub>3</sub>): δ 174.14, 159.62, 130.23, 129.97, 129.95, 129.64 (2C), 113.98 (2C), 73.40, 70.78, 69.16, 65.60, 55.49, 34.36, 32.12, 29.98, 29.91, 29.74, 29.53 (2C), 29.38, 29.32 (2C), 27.44, 27.38, 25.12, 22.90, 14.33.

### Synthesis of **U23**

**U22** (190 mg, 0.40 mmol) was stirred with imidazole (52 mg, 0.76 mmol) and TBSCl (226 mg, 0.57 mmol) for 16 h at room temperature under solvent-free (neat) conditions. The mixture was purified by silica gel column chromatography (Wako gel<sup>®</sup> C-200, 5% ethyl acetate/*n*-hexane) to provide **U23** as a colorless oil (237 mg, 0.40 mmol, quant.); <sup>1</sup>H-NMR (400 MHz, CDCl<sub>3</sub>): δ 7.24 (d, 2H, *J* = 8.7 Hz), 6.87 (d, 2H, *J* = 8.7 Hz), 5.34 (m, 2H), 4.46 (s, 2H), 4.18 (m, 2H), 4.01 (m, 2H), 3.80 (s, 3H), 3.42 (d, 2H, *J* = 5.3 Hz), 2.28 (t, 2H, *J* = 7.6 Hz), 2.01 (m, 4H), 1.59 (m, 2H), 1.38-1.20 (m, 20H), 0.88 (t, 3H, *J* = 6.4 Hz), 0.87 (s, 9H), 0.07 (s, 3H), 0.06 (s, 3H); <sup>13</sup>C-NMR (100 MHz, CDCl<sub>3</sub>): δ 173.89, 159.42, 130.45, 130.22, 129.98, 129.45(2C), 113.98(2C), 73.33, 71.76, 69.95, 66.40, 55.49, 34.49, 32.12, 29.99, 29.93, 29.75, 29.54 (2C), 29.41, 29.36, 29.33, 27.44, 27.40, 25.96 (3C), 25.14, 22.90, 18.34, 14.33, -4.48, -4.59; ESI-MS (*m/z*); 591.4 [M+H]<sup>+</sup>.

### Synthesis of **U24**

To a solution of **U23** (237 mg, 0.40 mmol) in a mixture of CH<sub>2</sub>Cl<sub>2</sub> (4.5 mL) and water (0.5 mL), DDQ (182 mg, 0.80 mmol) was added at 0°C, and the mixture was stirred for 2 h at 0°C. The reaction was quenched with saturated aqueous NaHCO<sub>3</sub>, extracted with CH<sub>2</sub>Cl<sub>2</sub>, washed with brine, and dried over anhydrous MgSO<sub>4</sub>. The crude product was purified by silica gel column chromatography (Wako gel<sup>®</sup> C-200, 5–15% ethyl acetate/*n*-hexane) to give **U24** as a colorless oil (182 mg, 0.31 mmol, 77%); <sup>1</sup>H-NMR (400 MHz, CDCl<sub>3</sub>): δ 5.40-5.25 (m, 2H), 4.13-4.04 (m, 2H), 3.96-3.88 (m, 1H), 3.63-3.50 (br m, 2H), 2.31 (t, 2H, *J* = 7.6 Hz), 2.05-1.93 (m, 4H), 1.65-1.55 (m, 2H), 1.45-1.20 (m, 20H), 0.90 (s, 9H), 0.88 (t, 3H, *J* = 7.0 Hz), 0.11 (s, 6H); <sup>13</sup>C-NMR (100 MHz, CDCl<sub>3</sub>): δ 173.95, 130.24, 129.96, 70.81, 65.02, 64.13, 34.43, 32.12, 29.99, 29.91, 29.74, 29.54 (2C), 29.38, 29.34, 29.31, 27.44, 27.39, 25.95 (3C), 25.11, 22.90, 18.28, 14.33, -4.43, -4.61; ESI-MS (*m/z*); 471.4 [M+H]<sup>+</sup>.

### Synthesis of **U25**

To a solution of **U24** (170 mg, 0.36 mmol) in anhydrous CH<sub>2</sub>Cl<sub>2</sub> (7 mL), activated MS4A (500 mg) was added, and the mixture was stirred for 30 min at room temperature under Ar atmosphere. Methyl *N,N,N',N'*-tetraisopropylphosphordiamidite (132 mg, 0.50 mmol) and *1H*-tetrazole (13 mg, 0.18 mmol) were added to the mixture at room temperature. After stirring for 2 h at room temperature, choline tosylate (303 mg, 1.1 mmol) and *1H*-tetrazole (77 mg, 1.1 mmol) were added to the mixture, followed by the stirring for 2 h at room temperature. The reaction mixture was cooled to 0°C, then Bu<sub>4</sub>NIO<sub>4</sub> (238 mg, 0.55 mmol) was added in one portion, and the mixture was stirred for 30 min at room temperature. The reaction mixture was filtered through Celite, and the filtrate was washed with 10% (w/v) aqueous Na<sub>2</sub>S<sub>2</sub>O<sub>3</sub> and saturated aqueous NaHCO<sub>3</sub>. The organic layer was dried over anhydrous MgSO<sub>4</sub>, concentrated under reduced pressure, and the crude product was purified by silica gel column chromatography (Wako gel<sup>®</sup> C-200, 10% methanol/CHCl<sub>3</sub>) to provide **U25** as a

colorless oil (220 mg, 0.267 mmol, 74%); <sup>1</sup>H-NMR (400 MHz, CDCl<sub>3</sub>:MeOD=1:1): δ 5.36-5.32 (m, 2H), 4.58-4.50 (m, 2H), 4.24-4.18 (m, 1H), 4.15-4.02 (m, 4H), 3.86 (dd, 3H, *J* = 0.8, 11.3 Hz), 3.79-3.76 (m, 2H), 3.24 (s, 9H), 2.36 (t, 2H, *J* = 7.6 Hz), 2.10-1.95 (m, 4H), 1.68-1.58 (m, 2H), 1.40-1.20 (m, 20H), 0.92 (s, 9H), 0.89 (t, 3H, *J* = 7.0 Hz), 0.14 (s, 6H); <sup>13</sup>C-NMR (100 MHz, CDCl<sub>3</sub>:MeOD=1:1): δ 174.91, 130.77, 130.50, 70.07, 66.49, 65.60, 62.31, 58.21, 55.83, 54.61 (3C), 34.91, 32.77, 30.58, 30.52, 30.34, 30.17, 30.12, 30.01, 29.94, 29.90, 27.97, 27.93, 26.20 (3C), 25.72, 23.49, 18.78, 14.52, -4.41 (2C); ESI-MS (*m/z*) 651.5 [M+H]<sup>+</sup>.

#### *Synthesis of U26*

To a solution of **U25** (220 mg, 0.267 mmol) in a mixture of CH<sub>2</sub>Cl<sub>2</sub> (2 mL), CH<sub>3</sub>CN (3 mL), and *i*PrOH (3 mL), trimethylamine (4.5 mL, 45% (w/v) solution in water) was added at room temperature. After stirring for 12 h at room temperature, the solvent was removed under reduced pressure. The crude product was dissolved again in a mixture of THF (6 mL) and water (3 mL), then 1.0 M aqueous HCl (250 μL) was added to the solution, and the stirring was continued for a further 12 h at room temperature. The reaction was quenched with 25% (w/v) aqueous NH<sub>3</sub> at 0°C, extracted with 10% MeOH/CHCl<sub>3</sub> and dried over anhydrous Na<sub>2</sub>SO<sub>4</sub>. The crude product was purified by silica gel column chromatography (Wako gel<sup>®</sup> C-200, 2:8:0.2-5:5:0.2 methanol/CHCl<sub>3</sub>/water) to give **U26** as a colorless oil (118 mg, 0.224 mmol, 84%); <sup>1</sup>H-NMR (400 MHz, CDCl<sub>3</sub>:MeOD=1:1): δ 5.38-5.29 (m, 2H), 4.32-4.26 (m, 2H), 4.18 (dd, 1H, *J* = 4.7, 11.3 Hz), 4.12 (dd, 1H, *J* = 6.1, 11.3 Hz), 4.02-3.85 (m, 3H), 3.65-3.62 (m, 2H), 3.23 (s, 9H), 2.36 (t, 2H, *J* = 7.6 Hz), 2.05-1.95 (m, 4H), 1.65-1.59 (m, 2H), 1.38-1.22 (m, 20H), 0.89 (t, 3H, *J* = 6.9 Hz); <sup>13</sup>C-NMR (100 MHz, CDCl<sub>3</sub>:MeOD=1:1): δ 175.21, 130.72, 130.51, 69.55, 67.65, 67.25, 65.93, 60.02, 54.68 (3C), 34.82, 32.75, 30.56, 30.53, 30.32, 30.14, 30.08, 30.03, 29.95, 29.93, 27.94, 27.93, 25.70, 23.46, 14.51; ESI-MS (*m/z*); 522.3 [M+H]<sup>+</sup>.

#### *Synthesis of U27*

**U27** was synthesized in 5 steps according to the procedures described in refs. 1 and 2 using commercially available 1,12-undecanediol as a starting material; <sup>1</sup>H-NMR (400 MHz, CDCl<sub>3</sub>): δ 3.99 (s, 3H), 3.99 (s, 3H), 2.45 (br t, 2H, *J* = 7.4 Hz), 2.35 (t, 2H, *J* = 7.5 Hz), 2.01 (s, 3H), 1.67-1.59 (m, 2H), 1.45-1.25 (m, 16H); <sup>13</sup>C-NMR (100 MHz, CDCl<sub>3</sub>): δ 184.91, 184.38, 179.09, 144.51 (2C), 143.32, 138.89, 61.36 (2C), 34.06, 30.23, 29.70, 29.65, 29.58, 29.55, 29.40, 29.24, 28.94, 26.61, 24.89, 12.12.

#### *Synthesis of U28*

To an ice-cooled solution of **U4** (30 mg, 0.11 mmol) in acetone (5 mL), Jone's reagent (0.13 mmol) was added, and the mixture was stirred for 2 h at room temperature. The reaction was quenched with water, extracted with diethyl ether, and dried over anhydrous MgSO<sub>4</sub>. The crude product was purified by silica gel column chromatography (Wako gel<sup>®</sup> C-200, 60% ethyl acetate/*n*-hexane) to provide **U28** as an orange oil (20 mg, 0.071

mmol, 64%); <sup>1</sup>H-NMR (400 MHz, CDCl<sub>3</sub>): δ 3.99 (s, 3H), 3.99 (s, 3H), 2.49 (br t, 2H, *J* = 7.8 Hz), 2.39 (t, 2H, *J* = 7.4 Hz), 2.02 (s, 3H), 1.75-1.65 (m, 2H), 1.52-1.42 (m, 2H); <sup>13</sup>C-NMR (100 MHz, CDCl<sub>3</sub>): δ 184.78, 184.28, 179.17, 144.54 (2C), 142.47, 139.29, 61.37 (2C), 33.78, 28.18, 26.17, 24.85, 12.16.

#### *Synthesis of U29*

**U29** was prepared from **U5** according to the same procedure described for **U28**. The crude product was purified by silica gel column chromatography (Wako gel<sup>®</sup> C-200, 50% ethyl acetate/*n*-hexane) to provide **U29** as an orange oil (29 mg, 0.089 mmol, 92%); <sup>1</sup>H-NMR (400 MHz, CDCl<sub>3</sub>): δ 3.99 (s, 3H), 3.99 (s, 3H), 2.45 (br t, 2H, *J* = 7.2 Hz), 2.35 (t, 2H, *J* = 7.5 Hz), 2.01 (s, 3H), 1.70-1.60 (m, 2H), 1.45-1.25 (m, 2H); <sup>13</sup>C-NMR (100 MHz, CDCl<sub>3</sub>): δ 184.91, 184.37, 179.22, 144.54 (2C), 143.17, 138.94, 61.36 (2C), 34.02, 29.78, 29.16, 29.09, 28.83, 26.55, 24.82, 12.13.

#### *Synthesis of U30*

**U30** was prepared from **U27** according to the same procedure described for **U28**. The crude product was purified by silica gel column chromatography (Wako gel<sup>®</sup> C-200, 30–60% ethyl acetate/*n*-hexane) to provide **U30** as an orange oil (63 mg, 0.17 mmol, 75%); <sup>1</sup>H-NMR (400 MHz, CDCl<sub>3</sub>): δ 3.99 (s, 3H), 3.99 (s, 3H), 2.45 (t, 2H, *J* = 7.4 Hz), 2.35 (t, 2H, *J* = 7.5 Hz), 2.01 (s, 3H), 1.67-1.59 (m, 2H), 1.45-1.25 (m, 16H); <sup>13</sup>C-NMR (100 MHz, CDCl<sub>3</sub>): δ 184.91, 184.38, 179.09, 144.51 (2C), 143.32, 138.89, 61.36 (2C), 34.06, 30.23, 29.70, 29.65, 29.58, 29.55, 29.40, 29.24, 28.94, 26.61, 24.89, 12.12.

#### *Synthesis of PC-UQ1*

To a solution of **U26** (21 mg, 0.040 mmol) and **U28** (19 mg, 0.067 mmol) in anhydrous CHCl<sub>3</sub> (5 mL, containing amylene as stabilizer), MNBA (40 mg, 0.12 mmol) and DMAP (25 mg, 0.20 mmol) were added at room temperature under N<sub>2</sub> atmosphere, and the mixture was stirred for 11 h at room temperature. The reaction was quenched with water, extracted with CHCl<sub>3</sub>, and dried over Na<sub>2</sub>SO<sub>4</sub>. The crude product was purified by silica gel column chromatography (Wako gel<sup>®</sup> C-200, 5% methanol/CHCl<sub>3</sub> to 2:8:0.2 methanol/CHCl<sub>3</sub>/H<sub>2</sub>O) to give **PC-UQ1** as a yellow oil (14 mg, 0.018 mmol, 45%); <sup>1</sup>H-NMR (400 MHz, CDCl<sub>3</sub>:MeOD = 1:1): δ 5.38-5.29 (m, 2H), 5.27-5.20 (m, 1H), 4.43 (dd, 1H, *J* = 3.3, 12.0 Hz), 4.30-4.23 (m, 2H), 4.17 (dd, 1H, *J* = 6.7, 12.0 Hz), 4.04-3.98 (m, 2H), 4.00 (s, 3H), 3.99 (s, 3H), 3.65-3.62 (m, 2H), 3.24 (s, 9H), 2.50 (br t, 2H, *J* = 7.8 Hz), 2.40 (t, 2H, *J* = 7.4 Hz), 2.32 (t, 2H, *J* = 7.6 Hz), 2.04 (s, 3H), 2.04-1.95 (m, 4H), 1.73-1.64 (m, 2H), 1.64-1.55 (m, 2H), 1.51-1.42 (m, 2H), 1.38-1.20 (m, 20H), 0.89 (t, 3H, *J* = 6.9 Hz); <sup>13</sup>C-NMR (100 MHz, CDCl<sub>3</sub>:MeOD = 1:1): δ 185.52, 185.04, 174.67, 173.84, 145.17 (2C), 143.17, 140.01, 130.64, 130.37, 71.43, 67.15, 64.38, 63.30, 61.67 (2C), 59.82, 54.67 (3C), 34.69, 34.43, 32.60, 30.43, 30.40, 30.19, 30.00, 29.96, 29.89, 29.80, 29.78, 28.71, 27.84, 27.82, 26.61, 25.55, 25.52, 23.33, 14.47, 12.31; ESI-MS (*m/z*); 786.5 [M+H]<sup>+</sup>.



### Synthesis of **PC-UQ2**

**PC-UQ2** was prepared from **U26** and **U29** according to the same procedure described for **PC-UQ1**. The crude product was purified by silica gel chromatography (Wako gel<sup>®</sup> C-200, 20% methanol/CHCl<sub>3</sub> to 2:8:0.1 methanol/CHCl<sub>3</sub>/H<sub>2</sub>O) to give **PC-UQ2** as a yellow oil (33 mg, 0.040 mmol, 68%); <sup>1</sup>H-NMR (400 MHz, CDCl<sub>3</sub>): δ 5.40-5.30 (m, 2H), 5.28-5.20 (m, 1H), 4.43 (dd, 1H, *J* = 3.0, 12.0 Hz), 4.32-4.22 (br m, 2H), 4.17 (dd, 1H, *J* = 6.7, 11.8 Hz), 4.05-3.99 (m, 2H), 4.00 (s, 3H), 3.99 (s, 3H), 3.65-3.60 (m, 2H), 3.24 (s, 9H), 2.47 (br t, 2H, *J* = 7.1 Hz), 2.38-2.30 (m, 4H), 2.05-1.95 (m, 4H), 2.04 (s, 3H), 1.70-1.55 (m, 4H), 1.45-1.20 (m, 28H), 0.89 (t, 3H, *J* = 6.7 Hz); <sup>13</sup>C-NMR (100 MHz, CDCl<sub>3</sub>): δ 185.59, 185.05, 174.62, 174.18, 145.06(2C), 143.76, 139.61, 130.61, 130.31, 71.11, 67.13, 64.27, 63.31, 61.64 (2C), 59.73, 54.65 (3C), 34.77, 34.68, 32.54, 30.37 (2C), 30.27, 30.13, 29.94, 29.91, 29.84, 29.75 (2C), 29.66, 29.59, 29.30, 27.77 (2C), 26.94, 25.50, 25.47, 23.28, 14.46, 12.27; ESI-MS (*m/z*): 828.5 [M+H]<sup>+</sup>.

### Synthesis of **PC-UQ3**

**PC-UQ3** was prepared from **U26** and **U30** according to the same procedure described for **PC-UQ1**. The crude product was purified by silica gel column chromatography (Wako gel<sup>®</sup> C-200, 20% methanol/CHCl<sub>3</sub> to 2:8:0.2 methanol/CHCl<sub>3</sub>/H<sub>2</sub>O) to give **PC-UQ3** as a yellow oil (12 mg, 0.014 mmol, 36%); <sup>1</sup>H-NMR (400 MHz, CDCl<sub>3</sub>:MeOD = 1:1): δ 5.38-5.32 (m, 2H), 5.27-5.22 (m, 1H), 4.43 (dd, 1H, *J* = 3.0, 12.0 Hz), 4.32-4.22 (m, 2H), 4.17 (dd, 1H, *J* = 6.9, 12.0 Hz), 4.01-3.98 (m, 2H), 3.99 (s, 3H), 3.99 (s, 3H), 3.65-3.58 (m, 2H), 3.23 (s, 9H), 2.47 (br t, 2H, *J* = 7.4 Hz), 2.34 (t, 2H, *J* = 7.2 Hz), 2.32 (t, 2H, *J* = 7.4 Hz), 2.04-1.95 (m, 4H), 2.02 (s, 3H), 1.65-1.55 (m, 4H), 1.45-1.22 (m, 36H), 0.89 (t, 3H, *J* = 6.8 Hz); <sup>13</sup>C-NMR (100 MHz, CDCl<sub>3</sub>:MeOD = 1:1): δ 185.64, 185.10, 174.63, 174.28, 145.07 (2C), 143.94, 139.57, 130.62, 130.33, 71.15, 67.19, 64.35, 63.35, 61.64 (2C), 59.75, 54.65 (3C), 34.86, 34.70, 32.56, 30.48, 30.39, 30.37, 30.24 (2C), 30.15 (3C), 30.03, 29.96, 29.93, 29.86, 29.76 (3C), 29.38, 27.81, 27.79, 27.00, 25.57, 25.52, 23.29, 14.46, 12.25; ESI-MS (*m/z*) 884.6 [M+H]<sup>+</sup>.

### Synthesis of **U31**

**U31** was synthesized in 7 steps according to the procedures described in ref. 7 using commercially available *trans,trans*-farnesyl acetate as a starting material. <sup>1</sup>H-NMR (400 MHz, CDCl<sub>3</sub>): δ 5.53 (m, 1H), 5.09 (m, 1H), 4.02 (d, 2H, *J* = 8.4 Hz), 3.58 (t, 2H, *J* = 6.6 Hz), 2.13-2.04 (m, 4H), 2.00 (br t, 2H, *J* = 7.7 Hz), 1.73 (s, 3H), 1.64-1.57 (m, 2H), 1.59 (s, 3H), 0.90 (s, 9H), 0.05 (s, 6H); <sup>13</sup>C-NMR (100 MHz, CDCl<sub>3</sub>): δ 143.80, 135.60, 123.63, 120.78, 63.11, 39.73, 35.98, 31.38, 29.87, 26.30, 26.19 (3C), 18.57, 16.25, 16.19, -5.03 (2C).

### Synthesis of **U32**

To a solution of **U31** (390 mg, 1.04 mmol) and **U9** (236 mg, 0.95 mmol) in a mixture of anhydrous THF (3

mL) and DMF (9 mL), potassium *tert*-butoxide (180 mg, 1.60 mmol) was slowly added at -30°C under N<sub>2</sub> atmosphere. The mixture was allowed to warm up to 0°C, and stirred for 16 h. The reaction was quenched with saturated aqueous NH<sub>4</sub>Cl, extracted with diethyl ether, and dried over anhydrous MgSO<sub>4</sub>. The crude product was purified by silica gel column chromatography (Wako gel<sup>®</sup> C-200, 5% ethyl acetate/*n*-hexane) to give **U32** as a slightly yellow oil (340 mg, 0.626 mmol, 66%); <sup>1</sup>H-NMR (400 MHz, CDCl<sub>3</sub>): δ 6.08-6.03 (m, 2H), 5.13-5.05 (m, 2H), 3.91 (s, 3H), 3.88 (s, 3H), 3.57 (t, 2H, *J* = 6.6 Hz), 3.09 (m, 1H), 3.01 (m, 1H), 2.76 (dd, 1H, *J* = 7.4, 15.1 Hz), 2.43 (dd, 1H, *J* = 6.4, 15.1 Hz), 2.07-1.93 (m, 6H), 1.79 (br d, 1H, *J* = 9.4 Hz), 1.63-1.55 (m, 8H), 1.50 (s, 3H), 1.46 (td, 1H, *J* = 1.5, 9.5 Hz), 0.89 (s, 9H), 0.03 (s, 6H); <sup>13</sup>C-NMR (100 MHz, CDCl<sub>3</sub>): δ 199.09, 198.47, 151.04, 149.37, 138.26, 138.20, 137.41, 135.31, 124.03, 119.86, 63.12, 60.51, 60.27, 59.56, 56.29, 54.68, 53.36, 43.70, 40.17, 36.00, 31.41, 26.74, 26.19 (3C), 23.61, 18.57, 16.59, 16.20, -5.04 (2C).

#### *Synthesis of U33*

**U33** was prepared from **U32** according to the same procedure described for **U12**. The crude product was purified by silica gel column chromatography (Wako gel<sup>®</sup> C-200, 5% ethyl acetate/*n*-hexane) to provide **U33** as an orange oil (295 mg, 0.624 mmol, quant.); <sup>1</sup>H-NMR (400 MHz, CDCl<sub>3</sub>): δ 5.07 (br t, 1H, *J* = 6.4 Hz), 4.94 (br t, 1H, *J* = 7.0 Hz), 4.00 (s, 3H), 3.98 (s, 3H), 3.57 (t, 2H, *J* = 6.6 Hz), 3.18 (d, 2H, *J* = 7.0 Hz), 2.08-1.95 (m, 6H), 2.01 (s, 3H), 1.74 (s, 3H), 1.62-1.55 (m, 2H), 1.57 (s, 3H), 0.89 (s, 9H), 0.04 (s, 6H); <sup>13</sup>C-NMR (100 MHz, CDCl<sub>3</sub>): δ 184.99, 184.14, 144.61, 144.47, 141.91, 139.09, 137.84, 135.16, 124.13, 119.08, 63.09, 61.36 (2C), 39.91, 35.99, 31.40, 26.74, 26.19 (3C), 25.52, 18.56, 16.56, 16.20, 12.15, -5.05 (2C).

#### *Synthesis of U34*

To a solution of **U33** (252 mg, 0.529 mmol) in THF (4 mL), 1.0 M HCl aq. (1 mL) was added at room temperature. After stirring for 1 h at room temperature, the reaction was quenched with saturated aqueous NaHCO<sub>3</sub>, extracted with ethyl acetate, and dried over anhydrous MgSO<sub>4</sub>. The crude product was purified by silica gel column chromatography (Wako gel<sup>®</sup> C-200, 40% ethyl acetate/*n*-hexane) to give **U34** as an orange oil (189 mg, 0.47 mmol, 94%); <sup>1</sup>H-NMR (400 MHz, CDCl<sub>3</sub>): δ 5.08 (br t, 1H, *J* = 6.8 Hz), 4.92 (br t, 1H, *J* = 6.9 Hz), 4.00 (s, 3H), 3.98 (s, 3H), 3.60 (t, 2H, *J* = 6.5 Hz), 3.18 (d, 2H, *J* = 7.0 Hz), 2.10-1.98 (m, 6H), 2.01 (s, 3H), 1.73 (s, 3H), 1.68-1.59 (m, 2H), 1.59 (s, 3H); <sup>13</sup>C-NMR (100 MHz, CDCl<sub>3</sub>): δ 185.01, 184.16, 144.57, 144.45, 141.88, 139.11, 137.48, 135.09, 124.50, 119.35, 62.91, 61.36 (2C), 39.74, 36.10, 30.90, 26.38, 25.51, 16.42, 16.10, 12.14; ESI-MS (*m/z*): 363.2 [M+H]<sup>+</sup>.

#### *Synthesis of U35*

**U35** was prepared from **U34** according to the same procedure described for **U28**. The crude product was purified by silica gel column chromatography (Wako gel<sup>®</sup> C-200, 30% ethyl acetate/*n*-hexane) to give **U35** as an

orange oil (36 mg, 0.096 mmol, 69%); <sup>1</sup>H-NMR (400 MHz, CDCl<sub>3</sub>): δ 5.09 (br t, 1H, *J* = 6.9 Hz), 4.90 (br t, 1H, *J* = 7.0 Hz), 3.99 (s, 3H), 3.98 (s, 3H), 3.18 (d, 2H, *J* = 6.9 Hz), 2.42 (t, 2H, *J* = 7.7 Hz), 2.27 (t, 2H, *J* = 7.7 Hz), 2.10-2.03 (m, 2H), 2.02-1.95 (m, 2H), 2.00 (s, 3H), 1.72 (d, 3H, *J* = 0.88 Hz), 1.59 (s, 3H); <sup>13</sup>C-NMR (100 MHz, CDCl<sub>3</sub>): δ 184.95, 184.45, 177.72, 144.58 (2C), 141.87, 139.26, 137.31, 133.42, 125.07, 119.46, 61.38 (2C), 39.64, 34.48, 32.82, 26.37, 25.57, 16.40, 16.17, 12.14; ESI-MS (*m/z*): 375.2 [M-H]<sup>-</sup>, 377.3[M+H]<sup>+</sup>.

#### *Synthesis of PC-UQ4*

**PC-UQ4** was prepared from **U26** and **U35** according to the same procedure described for **PC-UQ1**, with the exception that 2,4,6-trichlorobenzoylchloride was used for the esterification. The crude product was purified by silica gel column chromatography (Wako gel<sup>®</sup> C-200, 20% methanol/CHCl<sub>3</sub> to 2:8:0.2 methanol/CHCl<sub>3</sub>/H<sub>2</sub>O) to give **PC-UQ4** as a yellow oil (26 mg, 0.030 mmol, 21%); <sup>1</sup>H-NMR (400 MHz, CDCl<sub>3</sub>:MeOD = 1:1): δ 5.40-5.29 (m, 2H), 5.25-5.19 (m, 1H), 5.11 (br t, 1H, *J* = 7.0 Hz), 4.95 (br t, 1H, *J* = 6.9 Hz), 4.40 (dd, 1H, *J* = 3.3, 12.0 Hz), 4.35-4.25 (m, 2H), 4.18 (dd, 1H, *J* = 6.6, 12.0 Hz), 4.03 (t, 2H, *J* = 5.9 Hz), 3.99 (s, 3H), 3.99 (s, 3H), 3.65-3.62 (m, 2H), 3.24 (s, 9H), 3.21 (t, 2H, *J* = 7.1 Hz), 2.45-2.39 (m, 2H), 2.33 (t, 2H, *J* = 7.5 Hz), 2.30-2.24 (m, 2H), 2.10-1.95 (m, 8H), 2.03 (s, 3H), 1.75 (s, 3H), 1.65-1.45 (m, 2H), 1.61 (s, 3H), 1.38-1.22 (m, 20H), 0.89 (t, 3H, *J* = 6.9 Hz); <sup>13</sup>C-NMR (100 MHz, CDCl<sub>3</sub>:MeOD = 1:1): δ 185.75, 184.94, 174.70, 173.87, 145.21, 145.13, 142.57, 139.83, 138.07, 134.07, 130.66, 130.38, 125.69, 119.91, 71.22, 67.13, 64.57, 63.28 (2C), 61.68, 60.04, 54.66 (3C), 40.21, 35.24, 34.71, 33.80, 32.63, 30.45, 30.43, 30.21, 30.03, 29.99, 29.92, 29.82 (2C), 27.86, 27.83, 27.15, 25.95, 25.58, 23.35, 16.70, 16.30, 14.48, 12.32; ESI-MS (*m/z*): 880.7 [M+H]<sup>+</sup>.

Outline of the syntheses of **PRA3**, **PRA4**, [<sup>125</sup>I]**PRA3**, and [<sup>125</sup>I]**PRA4**

**PRA3** and **PRA4** were synthesized according to the previously methods [8-10], as summarized in Scheme S4. The amine derivatives **A3**, **A4**, and **A5** were prepared from commercially available 4-phenylbutylamine. They were, in the presence of DIPEA, coupled with methylthiopseudourea **A10a** or **A10b**, which were in parallel synthesized from commercially available methyl 3-amino-5,6-dichloro-2-pyrazinecarboxylate in 4 steps, to provide **PRA3** and **PRA4**, respectively. [<sup>125</sup>I]**PRA3** and [<sup>125</sup>I]**PRA4** were prepared by the catalysis of chloramine T [7] using tin-precursor **A11** and **A12**, respectively.

Scheme S4<sup>d</sup>

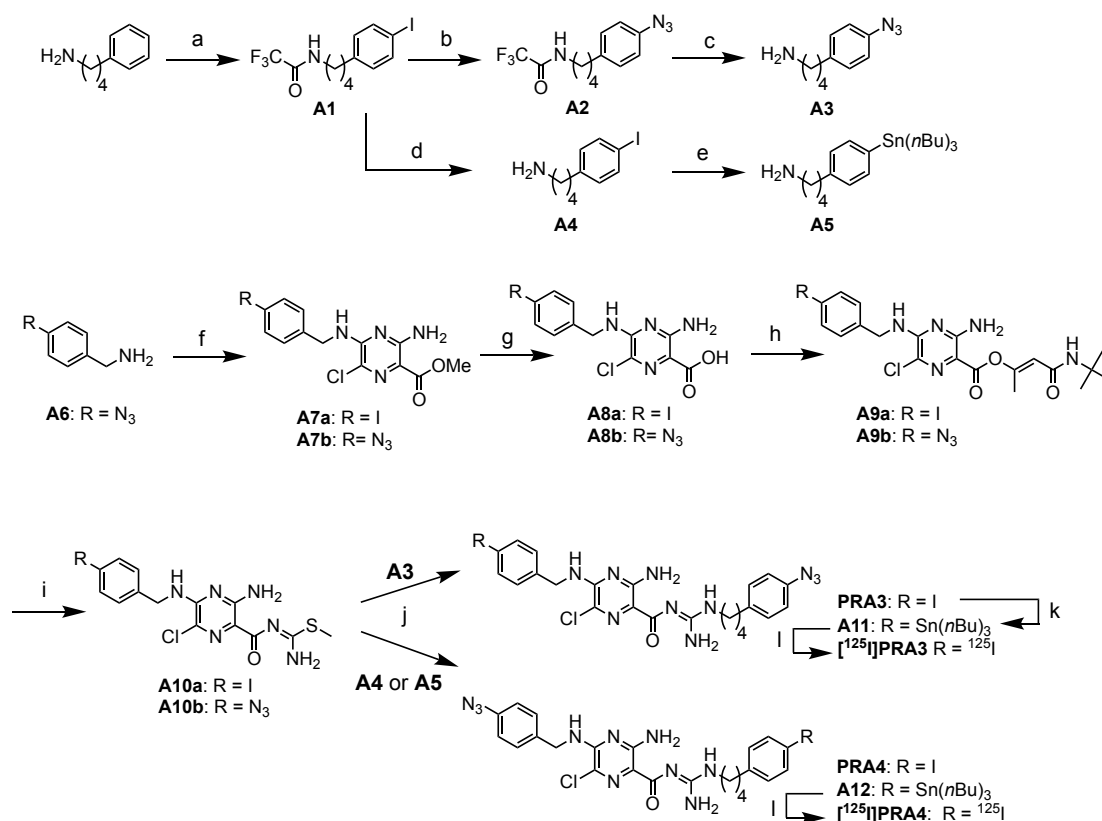

<sup>d</sup>Reagents and conditions: (a) i) I<sub>2</sub>, NaIO<sub>3</sub>, conc. H<sub>2</sub>SO<sub>4</sub>, AcOH, 70°C, 1.5 h; ii) TFAA, CH<sub>2</sub>Cl<sub>2</sub>, rt, 2 h, 31% (2 steps); (b) *trans*-*N,N'*-dimethylcyclohexane-1,2-diamine, CuI, *L*-ascorbic acid Na, EtOH/water, reflux, 1 h, 80%; (c) K<sub>2</sub>CO<sub>3</sub>, MeOH, reflux, 2 h, 77%; (d) aq. NaOH, MeOH, rt, overnight, 85%; (e) (Sn(*n*Bu)<sub>3</sub>)<sub>2</sub>, Pd(PPh<sub>3</sub>)<sub>4</sub>, dioxane, reflux, overnight, 36%; (f) methyl 3-amino-5,6-dichloro-2-pyrazinecarboxylate, 2-propanol, reflux, 4 h, 98 and 95% (for **A7a** and **A7b**); (g) aq. NaOH, MeOH, reflux, 1 h, 84 and 77% (for **A8a** and **A8b**); (h) 5-methylisoxazole, *t*-BuOH, TfOH, DMF, rt, 1 h, 70 and 62% (for **A9a** and **A9b**); (i) *S*-methylisothiourasulfate, aq. NaOH, CH<sub>2</sub>Cl<sub>2</sub>/THF, rt, overnight, 72 and 66% (for **A9a** and **A9b**); (j) DIPEA, THF, 65°C, overnight, 56, 82, and 47% (for **PRA3**, **PRA4**, and **A12**); (k) (Sn(*n*Bu)<sub>3</sub>)<sub>2</sub>, Pd(PPh<sub>3</sub>)<sub>4</sub>, dioxane, 50°C, 16 h, 9%; (l) [<sup>125</sup>I]NaI, chloramine T, K<sub>2</sub>HPO<sub>4</sub> aq., rt, 10 min, 63 and 39% (for [<sup>125</sup>I]**PRA3** and [<sup>125</sup>I]**PRA4**).

### Synthesis of **A1**

To a solution of 4-phenylbutylamine (8.0 g, 5.4 mmol) in a mixture of acetic acid (150 mL) and sulfuric acid (concentrated, 15 mL), iodine (7.5 g, 59 mmol) and NaIO<sub>3</sub> (3.2 g, 16 mmol) were added in portions, and the mixture was stirred for 1.5 h at 70°C. The mixture was concentrated under reduced pressure, and the residue was resuspended in water, washed with diethyl ether and dichloromethane. The water layer was basified with aqueous NaOH, then extracted with ethyl acetate. The organic layer was dried over anhydrous MgSO<sub>4</sub> to give crude 4-(4-iodophenyl)butylamine as a white solid.

To the solution of 4-(4-iodophenyl)butylamine in dichloromethane (150 mL) was added trifluoroacetic anhydride (9.1 g, 43 mmol). The mixture was stirred for 2 h at room temperature, and then it was diluted by dichloromethane and washed with saturated aqueous NaHCO<sub>3</sub>. The organic layer was dried over MgSO<sub>4</sub>. The crude product was purified by silica gel column chromatography (Wako gel<sup>®</sup> C-200, toluene) to give **A1** as a white solid (6.2 g, 17 mmol, 31 %, 2 steps); <sup>1</sup>H-NMR (400 MHz/CDCl<sub>3</sub>): δ 7.60 (dt, *J* = 8.3, 1.8 Hz, 2H), 6.92 (dt, *J* = 8.3, 1.8 Hz, 2H), 6.30 (br s, 1H), 3.37 (q, *J* = 6.5 Hz, 2H), 2.59 (t, *J* = 7.1 Hz, 2H), 1.68-1.55 (m, 4H); <sup>13</sup>C-NMR (100 MHz/CDCl<sub>3</sub>): δ 157.26, 141.39, 137.68 (2C), 130.68 (2C), 114.60, 91.23, 39.91, 34.95, 28.61, 28.32; ESI-MS (*m/z*): 372.1 [M + H]<sup>+</sup>.

### Synthesis of **A2**

To a solution of **A1** (700 mg, 1.89 mmol) in EtOH (10 mL) and water (2 mL), *trans*-*N,N'*-dimethylcyclohexane-1,2-diamine (538 mg, 3.78 mmol), NaN<sub>3</sub> (246 mg, 3.78 mmol), CuI (72 mg, 0.38 mmol), and sodium *L*-ascorbate (75 mg, 0.38 mmol) were added at room temperature. The mixture was heated under reflux for 1 h, then quenched with water and extracted with ethyl acetate. The organic layer was dried over anhydrous MgSO<sub>4</sub> and purified by silica gel column chromatography (Wako gel<sup>®</sup> C-200, 20% ethyl acetate/*n*-hexane) to give **A2** as a yellow solid (431 mg, 1.50 mmol, 80%); <sup>1</sup>H-NMR (400 MHz/CDCl<sub>3</sub>): δ 7.14 (dt, *J* = 8.5, 2.1 Hz, 2H), 6.95 (dt, *J* = 8.5, 2.1 Hz, 2H), 6.40 (br s, 1H), 3.37 (q, *J* = 6.5 Hz, 2H), 2.62 (t, *J* = 7.1 Hz, 2H), 1.69-1.57 (m, 4H); <sup>13</sup>C-NMR (100 MHz/CDCl<sub>3</sub>): δ 157.27, 138.59, 137.98, 129.89 (2C), 119.24 (2C), 117.47, 114.61, 39.94, 34.81, 28.60, 28.54; ESI-MS (*m/z*): 285.1 [M+H]<sup>+</sup>.

### Synthesis of **A3**

To a solution of **A2** (73 mg, 0.26 mmol) in MeOH (15 mL), K<sub>2</sub>CO<sub>3</sub> (108 mg, 0.781 mmol dissolved in 0.10 mL water) were added, and the mixture was heated under reflux for 2 h. The mixture was concentrated under reduced pressure, and the residue was resuspended in ethyl acetate and extracted with 1.0 M aqueous HCl. The aqueous layer was basified again with 1.0 M aqueous NaOH, and the amine **4** in free form extracted with ethyl acetate. The organic layer was dried over anhydrous MgSO<sub>4</sub> and concentrated under reduced pressure to give **A3** as a yellow oil (38 mg, 0.20 mmol, 77%); <sup>1</sup>H-NMR (500 MHz/CDCl<sub>3</sub>): δ 7.16 (d, *J* = 8.2 Hz, 2H), 6.94 (d, *J*

= 8.2 Hz, 2H), 2.71 (t,  $J = 6.9$  Hz, 2H), 2.60 (t,  $J = 7.6$  Hz, 2H), 1.66-1.60 (m, 2H), 1.50-1.44 (m, 2H);  $^{13}\text{C}$ -NMR (125 MHz/ $\text{CDCl}_3$ ):  $\delta$  139.29, 137.46, 129.72 (2C), 118.91 (2C), 41.99, 35.11, 33.19, 28.73; ESI-MS ( $m/z$ ): 191.1  $[\text{M}+\text{H}]^+$ .

#### *Synthesis of A4*

To a stirring solution of **A1** (2.0 g, 5.4 mmol) in MeOH (40 mL), 1.0 M aqueous NaOH (9.6 mL) was added, and the mixture was stirred for 16 h at room temperature. The mixture was concentrated under reduced pressure, and resuspended in ethyl acetate, extracted with 1.0 M aqueous HCl. The aqueous layer was basified with aqueous NaOH, extracted with ethyl acetate. The organic layer was dried over anhydrous  $\text{MgSO}_4$  to give **A4** as a white solid (1.26 g, 4.58 mmol, 85%);  $^1\text{H}$ -NMR (400 MHz/MeOD):  $\delta$  7.59 (dt,  $J = 8.3, 1.8$  Hz, 2H), 6.93 (dt,  $J = 8.3, 1.8$  Hz, 2H), 2.93 (br s, 2H), 2.68 (t,  $J = 7.1$  Hz, 2H), 2.57 (t,  $J = 7.7$  Hz, 2H), 1.65-1.58 (m, 2H), 1.51-1.44 (m, 2H);  $^{13}\text{C}$ -NMR (100 MHz/MeOD):  $\delta$  141.97, 137.42 (2C), 130.61 (2C), 90.81, 41.52, 35.22, 32.57, 28.53; ESI-MS ( $m/z$ ): 276.0  $[\text{M}+\text{H}]^+$ .

#### *Synthesis of A5*

To a solution of **A4** (300 mg, 1.09 mmol) in anhydrous 1,4-dioxane (3 mL), tributyliditine (2.2 mL, 4.4 mmol) and  $\text{Pd}(\text{PPh}_3)_4$  (126 mg, 0.110 mmol) were added at room temperature, and the mixture was heated under reflux for 16 h. The mixture was concentrated under reduced pressure, and the residue was purified by silica gel column chromatography (Wako gel<sup>®</sup> C-200, 2-30% MeOH/chloroform) to afford **A5** as a colorless oil (171 mg, 0.390 mmol, 36%);  $^1\text{H}$ -NMR (400 MHz/MeOD):  $\delta$  7.36 (d,  $J = 7.8$  Hz, 2H), 7.18 (d,  $J = 7.8$  Hz, 2H), 2.72 (t,  $J = 7.3$  Hz, 2H), 2.64 (t,  $J = 7.5$  Hz, 2H), 1.72-1.50 (m, 10H), 1.42-1.32 (m, 6H), 1.16-1.00 (m, 6H), 0.92 (t,  $J = 7.3$  Hz, 9H);  $^{13}\text{C}$ -NMR (100 MHz/MeOD):  $\delta$  144.20, 139.83, 138.29 (2C), 130.17 (2C), 42.96, 37.47, 33.33, 31.15 (3C), 30.66, 29.26 (3C), 14.91 (3C), 11.16 (3C); ESI-MS ( $m/z$ ): 440.3  $[\text{M} + \text{H}]^+$ .

#### *Synthesis of A6*

To an ice-cooled solution of 4-aminobenzylamine (7.4 g, 60 mmol) in 2.0 M aqueous HCl (50 mL),  $\text{NaNO}_2$  (4.6 g, 60 mmol) in water (10 mL) was added dropwise. After stirring for 20 min at  $0^\circ\text{C}$ ,  $\text{NaN}_3$  (4.0 g, 60 mmol) in water (10 mL) was added, and the stirring was continued for 3 h at  $0^\circ\text{C}$ . The reaction was quenched with saturated aqueous  $\text{NaHCO}_3$ , extracted with ethyl acetate, and the organic layer was dried over anhydrous  $\text{MgSO}_4$ . Silica gel column chromatography (Wako gel<sup>®</sup> C-200, 10% MeOH/chloroform) of the crude product gave **A6** as a brown solid (3.64 g, 24.6 mmol, 38%);  $^1\text{H}$ -NMR (400 MHz/ $\text{CDCl}_3$ ):  $\delta$  7.30 (d,  $J = 8.3$  Hz, 2H), 6.99 (d,  $J = 8.3$  Hz, 2H), 3.84 (s, 2H);  $^{13}\text{C}$ -NMR (100 MHz/ $\text{CDCl}_3$ ):  $\delta$  140.18, 138.65, 128.70 (2C), 119.25 (2C), 46.01.

#### *Synthesis of A7a*

To a solution of methyl 3-amino-5,6-dichloro-2-pyrazinecarboxylate (500 mg, 2.25 mmol) in 2-propanol (10 mL), 4-iodobenzylamine (1.05 g, 4.50 mmol) was added in one portions, and the mixture was heated under reflux for 4 h. After the reaction mixture was concentrated under reduced pressure, the residue was purified by silica gel column chromatography (Wako gel<sup>®</sup> C-200, 30% ethyl acetate/*n*-hexane) to give **6** as a yellow solid (924 mg, 2.21 mmol, 98%): <sup>1</sup>H-NMR (400 MHz/CDCl<sub>3</sub>): δ 7.68 (d, *J* = 8.4 Hz, 2H), 7.07 (d, *J* = 8.4 Hz, 2H), 5.84 (t, *J* = 5.0 Hz, 1H), 4.60 (d, *J* = 5.9 Hz, 2H), 3.90 (s, 3H); <sup>13</sup>C-NMR (100 MHz/CDCl<sub>3</sub>): δ 166.68, 155.62, 151.45, 138.10 (2C), 137.50, 129.79 (2C), 121.44, 111.22, 93.36, 52.32, 44.86; ESI-MS (*m/z*): 419.0 [M+H]<sup>+</sup>.

#### Synthesis of **A7b**

**A7b** was prepared from **A6** according to the procedure described for **A7a**. The crude product was purified by silica gel column chromatography (Wako gel<sup>®</sup> C-200, 30% ethyl acetate/*n*-hexane) to give **A7b** as a yellow solid (846 mg, 2.53 mmol, 95%): <sup>1</sup>H-NMR (400 MHz/CDCl<sub>3</sub>): δ 7.32 (dt, *J* = 8.6, 2.3 Hz, 2H), 7.02 (dt, *J* = 8.6, 2.3 Hz, 2H), 5.82 (br s, 1H), 4.62 (d, *J* = 5.8 Hz, 2H), 3.90 (s, 3H); <sup>13</sup>C-NMR (100 MHz/CDCl<sub>3</sub>): δ 166.70, 155.66, 151.46, 139.86, 134.48, 129.45 (2C), 121.48, 119.61 (2C), 111.12, 52.32, 44.85; ESI-MS (*m/z*): 334.1 [M+H]<sup>+</sup>.

#### Synthesis of **A8a**

To a solution of **A7a** (374 mg, 0.893 mmol) in MeOH (5 mL), 6.0 M aqueous NaOH (0.45 mL, 2.7 mmol) was added, and the mixture was heated under reflux for 1 h. The reaction mixture was cooled to room temperature and neutralized with 6.0 M aqueous HCl. The white solid, which was formed by addition of water, was collected by filtration to give **A8a** (305 mg, 0.754 mmol, 84%) as a white solid; <sup>1</sup>H-NMR (400 MHz/DMSO-*d*<sub>6</sub>): δ 7.68 (d, *J* = 8.3 Hz, 2H), 7.17 (d, *J* = 8.3 Hz, 2H), 4.50 (d, *J* = 6.2 Hz, 2H); <sup>13</sup>C-NMR (100 MHz/DMSO-*d*<sub>6</sub>): δ 202.13, 169.76, 155.58, 149.91, 141.00, 137.75 (2C), 130.64 (2C), 117.42, 93.09, 44.02; ESI-MS (*m/z*): 403.0 [M-H]<sup>+</sup>.

#### Synthesis of **A8b**

**A8b** was prepared from **A7b** according to the procedure described for **A8a**, and the product was obtained as a yellow solid (132 mg, 0.413 mmol, 77%): <sup>1</sup>H-NMR (400 MHz/DMSO-*d*<sub>6</sub>): δ 7.50 (br s, 1H), 7.41 (dt, *J* = 8.6, 2.2 Hz, 2H), 7.09 (dt, *J* = 8.6, 2.2 Hz, 2H), 4.54 (d, *J* = 6.2 Hz, 2H); <sup>13</sup>C-NMR (125 MHz/DMSO-*d*<sub>6</sub>): δ 202.12, 168.95, 155.85, 150.54, 138.56, 137.80, 130.00 (2C), 119.74 (2C), 118.29, 43.99; ESI-MS (*m/z*): 320.0 [M+H]<sup>+</sup>.

#### Synthesis of **A9a**

To a mixture of 5-methylisoxazole (570 mg, 6.9 mmol) and *t*-BuOH (510 mg, 6.9 mmol), TfOH (1.0 g, 6.9 mmol) was added dropwise at room temperature. The mixture was stirred for 1 h at room temperature, then

**A8a** (932 mg, 2.30 mmol) in DMF (15 mL) and TEA (700 mg, 6.9 mmol) were added sequentially. After stirring for 16 h at room temperature, the reaction was quenched with iced water to form yellow precipitate. The resulting precipitate was collected by filtration and washed with water to afford **A9a** as a yellow solid (874 mg, 1.61 mmol, 70%); <sup>1</sup>H-NMR (400 MHz/CDCl<sub>3</sub>): δ 7.69 (d, *J* = 8.4 Hz, 2H), 7.08 (d, *J* = 8.4 Hz, 2H), 6.62 (br s, 1H), 6.02 (t, *J* = 5.6 Hz, 1H), 5.42 (d, *J* = 1.0 Hz, 1H), 4.61 (d, *J* = 5.8 Hz, 2H), 2.13 (d, *J* = 0.92, 3H), 1.28 (s, 3H); <sup>13</sup>C-NMR (100 MHz/CDCl<sub>3</sub>): δ 163.73, 162.55, 156.30, 153.20, 151.88, 138.16 (2C), 137.14, 129.85 (2C), 122.05, 114.99, 109.51, 93.51, 51.27, 44.99, 29.05, 20.84; ESI-MS (*m/z*): 544.0 [M+H]<sup>+</sup>.

#### Synthesis of **A9b**

**A9b** was prepared from **A8b** according to the procedure described for **A9a**, and the product was obtained as a yellow solid (180 mg, 0.392 mmol, 62%); <sup>1</sup>H-NMR (400 MHz/CDCl<sub>3</sub>): δ 7.32 (d, *J* = 8.5 Hz, 2H), 7.01 (dt, *J* = 8.5, 2.2 Hz, 2H), 6.65 (br s, 1H), 6.07 (t, *J* = 6.4 Hz, 1H), 5.41 (d, *J* = 0.83 Hz, 1H), 4.63 (d, *J* = 5.8 Hz, 2H), 2.12 (d, *J* = 0.83 Hz, 3H), 1.27 (s, 9H); <sup>13</sup>C-NMR (100 MHz/CDCl<sub>3</sub>): δ 163.70, 162.54, 156.35, 153.20, 151.88, 139.92, 134.15, 129.52 (2C), 122.08, 119.60 (2C), 114.99, 109.33, 51.23, 44.92, 29.03, 20.84; ESI-MS (*m/z*): 459.1 [M+H]<sup>+</sup>.

#### Synthesis of **A10a**

To a solution of *S*-methylisothiurea sulfate (1.12 g, 4.02 mmol) in 1.0 M aqueous NaOH (4.8 mL), dichloromethane (4 mL) and THF (4 mL), **A9a** (874 mg, 1.61 mmol) was added in one portion. The mixture was stirred for 16 h at room temperature, then concentrated under reduced pressure. The residue was washed with water, MeOH, and diethyl ether to give **A10a** as a white solid (555 mg, 1.16 mmol, 72%); <sup>1</sup>H-NMR (400 MHz/DMSO-*d*<sub>6</sub>): δ 7.92 (t, *J* = 5.6 Hz, 1H), 7.70 (d, *J* = 8.2 Hz, 2H), 7.19 (d, *J* = 8.2 Hz, 2H), 4.54 (d, *J* = 6.0 Hz, 2H), 2.43 (s, 3H); ESI-MS (*m/z*): 477.0 [M + H]<sup>+</sup>.

#### Synthesis of **A10b**

**A10b** was prepared from **A9b** according to the procedure described for **A10a**, and the product was obtained as a yellow solid (221 mg, 0.564 mmol, 66%); <sup>1</sup>H-NMR (400 MHz/CDCl<sub>3</sub>): δ 7.31 (dt, *J* = 8.6, 2.2 Hz, 2H), 7.02 (dt, *J* = 8.6, 2.2 Hz, 2H), 5.81 (t, *J* = 5.4 Hz, 1H), 4.62 (d, *J* = 6.6 Hz, 2H), 2.45 (s, 3H); <sup>13</sup>C-NMR (125 MHz/DMSO-*d*<sub>6</sub>): δ 155.74, 155.68, 150.83, 150.77, 138.31, 136.87, 129.71 (2C), 119.39 (2C), 111.31, 107.45, 43.68, 13.75; ESI-MS (*m/z*): 392.0 [M+H]<sup>+</sup>.

#### Synthesis of **PRA3**

To a solution of **A3** (38 mg, 0.20 mmol) in anhydrous THF (2 mL), diisopropylethylamine (74 mg, 0.60 mmol) was added, and the mixture was stirred for 15 min at 65°C. Then, **A10a** (114 mg, 0.239 mmol) was added to



the mixture, and the reaction mixture was stirred for 16 h at 65°C. The mixture was concentrated under reduced pressure, and the residue was purified by silica gel column chromatography (Wako gel<sup>®</sup> C-200, 5% MeOH/chloroform) to afford **PRA3** as a yellow solid (69 mg, 0.11 mmol, 56%); <sup>1</sup>H-NMR (400 MHz/MeOD): δ 7.69 (d, *J* = 8.4 Hz, 2H), 7.27 (d, *J* = 8.4 Hz, 2H), 7.18 (d, *J* = 8.4 Hz, 2H), 7.01 (d, *J* = 8.4 Hz, 2H), 4.66 (s, 2H), 3.37-3.36 (m, 2H), 2.71 (t, *J* = 6.9 Hz, 2H), 1.77-1.73 (m, 4H); <sup>13</sup>C-NMR (100 MHz/MeOD): δ 167.33, 157.62, 155.56, 154.27, 140.27, 139.89, 139.34, 138.81 (2C), 131.12 (2C), 130.93 (2C), 122.38, 120.16 (2C), 110.29, 93.13, 45.21, 42.49, 35.73, 29.60, 28.83; ESI-MS (*m/z*): 619.0 [M+H]<sup>+</sup>.

#### Synthesis of **PRA4**

**PRA4** was prepared from **A4** and **A10b** according to the procedure described for **PRA3**. The crude product was purified by silica gel column chromatography (Wako gel<sup>®</sup> C-200, 5% MeOH/chloroform) to give **PRA4** (107 mg, 0.173 mmol, 82%) as a yellow solid; <sup>1</sup>H-NMR (400 MHz/MeOD): δ 7.60 (d, *J* = 8.2 Hz, 2H), 7.43 (d, *J* = 8.5 Hz, 2H), 7.03-7.00 (m, 4H), 4.65 (s, 2H), 3.38-3.35 (m, 2H), 2.65 (t, *J* = 7.0 Hz, 2H), 1.79-1.69 (m, 4H); <sup>13</sup>C-NMR (100 MHz/MeOD): δ 167.89, 158.12, 156.08, 154.80, 143.75, 141.11, 139.38 (2C), 137.61, 132.55 (2C), 131.37 (2C), 123.09, 120.80 (2C), 110.77, 92.36, 45.81, 43.21, 36.54, 30.11, 29.54; ESI-MS (*m/z*): 619.1 [M+H]<sup>+</sup>.

#### Synthesis of **A11**

To a solution of **PRA3** (36 mg, 0.058 mmol) in anhydrous 1,4-dioxane (0.5 mL), tributyliditin (0.14 mL, 0.29 mmol) and Pd(PPh<sub>3</sub>)<sub>4</sub> (7 mg, 0.006 mmol) were added, and the mixture was stirred for 16 h at 50°C. The mixture was concentrated under reduced pressure, and the residue was purified by silica gel column chromatography (Wako gel<sup>®</sup> C-200, 2-5% MeOH/chloroform) to afford **A11** as a yellow solid (4.0 mg, 0.0051 mmol, 8.8%); <sup>1</sup>H-NMR (400 MHz/MeOD): δ 7.43 (d, *J* = 8.0 Hz, 2H), 7.34 (d, *J* = 8.0 Hz, 2H), 7.27 (d, *J* = 8.4 Hz, 2H), 7.01 (d, *J* = 8.4 Hz, 2H), 4.62 (s, 2H), 3.37 (t, *J* = 7.1 Hz, 2H), 2.71 (t, *J* = 7.0 Hz, 2H), 1.77-1.73 (m, 4H), 1.62-1.54 (m, 6H), 1.39-1.32 (m, 6H), 1.17-1.02 (m, 6H), 0.88 (t, *J* = 7.3 Hz, 9H); <sup>13</sup>C-NMR (100 MHz/CDCl<sub>3</sub>): δ 166.68, 157.62, 155.56, 154.27, 138.59, 137.98, 137.65, 137.04 (2C), 131.00, 129.78 (2C), 128.84, 127.32 (2C), 118.99 (2C), 110.16, 34.62, 29.07 (3C), 28.97, 28.47, 28.34, 27.37 (3C), 25.69, 13.67 (3C), 9.62 (3C); ESI-MS (*m/z*): 783.2 [M+H]<sup>+</sup>.

#### Synthesis of **A12**

**A12** was prepared from **A5** and **A10b** according to the procedure described for **PRA3**. The crude product was purified by silica gel column chromatography (Wako gel<sup>®</sup> C-200, 5% MeOH/chloroform) to give **A12** as a white solid (19 mg, 0.024 mmol, 47%); <sup>1</sup>H-NMR (400 MHz/CDCl<sub>3</sub>): δ 7.36 (d, *J* = 7.7 Hz, 2H), 7.30 (d, *J* = 8.4 Hz, 2H), 7.13 (d, *J* = 7.7 Hz, 2H), 6.99 (d, *J* = 8.4 Hz, 2H), 4.59 (s, 2H), 3.30 (br s, 2H), 2.61 (br s, 2H), 1.71 (br

s, 4H), 1.71-1.45 (m, 6H), 1.37-1.25 (m, 6H), 1.11-0.94 (m, 6H), 0.88 (t,  $J = 7.3$  Hz, 9H);  $^{13}\text{C}$ -NMR (100 MHz/ $\text{CDCl}_3$ ):  $\delta$  167.89, 155.03, 150.76, 141.45, 139.51, 138.78, 136.54 (2C), 134.57, 131.04, 129.25 (2C), 128.82, 128.13 (2C), 120.38, 119.34, 44.62, 41.67, 35.38, 29.02 (3C), 29.01, 28.52, 27.40 (3C), 13.69 (3C), 9.55 (3C); ESI-MS ( $m/z$ ): 783.3  $[\text{M}+\text{H}]^+$ .

#### *Synthesis of [ $^{125}\text{I}$ ]PRA3*

To a solution of **A11** (1.0 mM in EtOH, 20  $\mu\text{L}$ ) in a screw-capped 1.5 mL plastic tube, [ $^{125}\text{I}$ ]NaI (Perkin-Elmer, NEZ 033A, 1 mCi, 2,000 Ci/mmol, 10  $\mu\text{L}$ ) was added. The radio-iodination was initiated by adding freshly prepared aqueous chloramine T (3.0 mM in 1.0 M KPi buffer (pH 7.4), 10  $\mu\text{L}$ ), and the mixture was incubated for 10 min at room temperature. The reaction was quenched with 5% (w/v) aqueous  $\text{NaHSO}_3$  (50  $\mu\text{L}$ ) then the mixture was subjected to HPLC (Shimadzu LC-10AS, Kyoto, Japan) purification using a C18 column (COSMOSIL 5C18-MSII, 4.6 mm x 150 mm, Nacalai Tesque, Kyoto, Japan) at a flow rate of 0.8 mL/min with MeOH/ 0.01% aqueous TFA as an eluent.

The column was eluted with isocratic 10% MeOH in 5 min, then isocratic 80% MeOH in 15 min. The fraction was collected every 30 s (400  $\mu\text{L}$ ) and the radioactivity and radiochemical purity were assessed by  $\gamma$ -counting system (COBRA<sup>TM</sup> II, Packard) and radio-TLC analysis. The radioactive fractions, corresponding to the retention time of cold PRA3 (14.5 min), were combined and the solvent was evaporated by a vacuum-centrifugal evaporator. [ $^{125}\text{I}$ ]PRA3 was stored as an ethanoic solution (1 mCi/mL) at 4°C. The radiochemical yield of [ $^{125}\text{I}$ ]PRA3 from the initial [ $^{125}\text{I}$ ]NaI was 63%. The radiochemical purity and the specific activity were >99% and 2,000 Ci/mmol, respectively (judged from HPLC and radio-TLC).

#### *Synthesis of [ $^{125}\text{I}$ ]PRA4*

[ $^{125}\text{I}$ ]PRA4 was prepared from **A12** according to the procedure described for [ $^{125}\text{I}$ ]PRA3. The radiochemical yield of [ $^{125}\text{I}$ ]PRA4 from the initial [ $^{125}\text{I}$ ]NaI was 39%. The radiochemical purity and the specific activity were >99% and 2,000 Ci/mmol, respectively (judged from HPLC and radio-TLC). [ $^{125}\text{I}$ ]PRA4 was stored as an ethanoic solution (1 mCi/mL) at 4°C.

Outline of the syntheses of **PRA5**, **PRA6**, [<sup>125</sup>I]**PRA5**, and [<sup>125</sup>I]**PRA6**

**PRA5** and **PRA6** were synthesized according to the previously methods [11], as illustrated in Scheme S5. The amine derivatives **A19** and **A20** were prepared from 4-amino-1-butanol and 4-phenylbutylamine as starting materials. They were subjected to the conjugation with pyrazine carboxylic acid **A8a** or **A8b** in the presence of *N*-methylmorpholine and HATU to provide **PRA5** and **PRA6**, respectively. [<sup>125</sup>I]**PRA5** and [<sup>125</sup>I]**PRA6** were prepared by the catalysis of chloramine T using tin-precursor **A21a** and **A21b**, respectively.

Scheme S5<sup>e</sup>

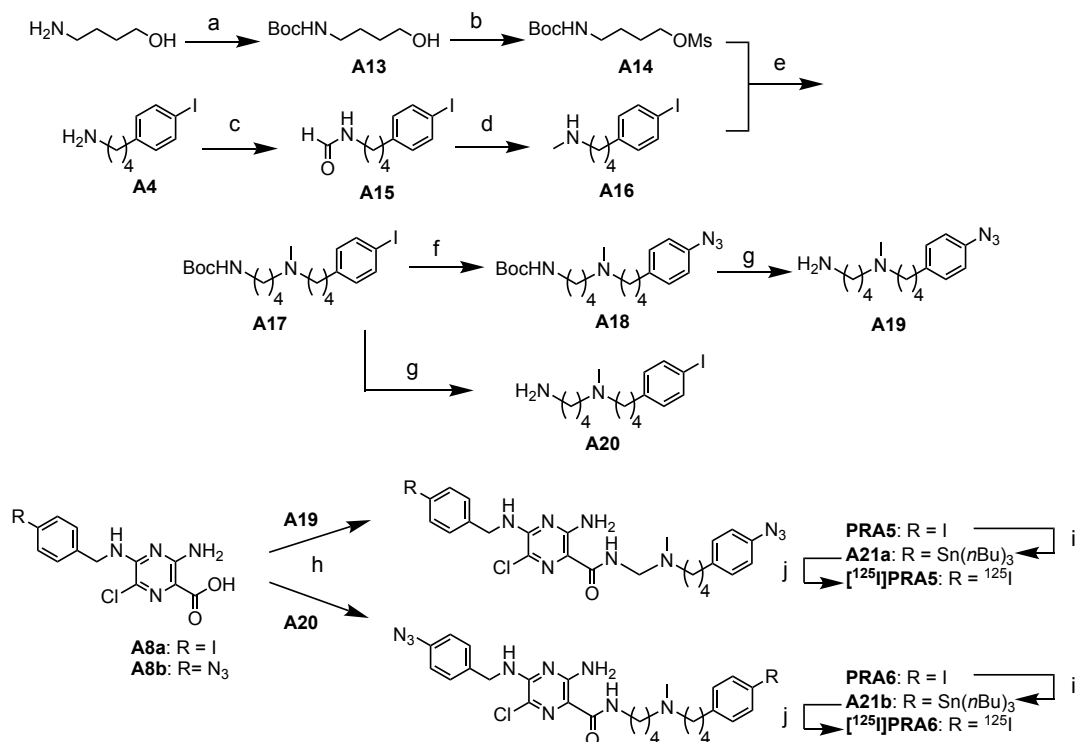

<sup>e</sup>Reagents and conditions: (a) Boc<sub>2</sub>O, TEA, CH<sub>2</sub>Cl<sub>2</sub>, rt, 1 h, quant.; (b) MsCl, TEA, CH<sub>2</sub>Cl<sub>2</sub>, 0°C, 30 min; (c) ethyl formate, reflux, overnight; (d) LiAlH<sub>4</sub>, THF, reflux, 3 h; (e) K<sub>2</sub>CO<sub>3</sub>, MeCN, reflux, overnight, 24% (3 steps from **A4**); (f) *trans*-*N,N*-dimethylcyclohexane-1,2-diamine, CuI, *L*-ascorbic acid Na, EtOH/water (4:1), reflux, 4 h; (g) TFA, CH<sub>2</sub>Cl<sub>2</sub>, rt, 30 min, crude and quant. (for **A19** and **A20**); (h) 4-methylmorpholine, HATU, DMF, rt, 2 h, 23 (2 steps) and 60% (for **PRA5** and **PRA6**); (i) (Sn(*n*-Bu)<sub>3</sub>)<sub>2</sub>, Pd(PPh<sub>3</sub>)<sub>4</sub>, dioxane, 50°C, 4 h, 18 and 17% (for **A21a** and **A21b**); (j) [<sup>125</sup>I]NaI, chloramine T, aq. K<sub>2</sub>HPO<sub>4</sub>, rt, 10 min, 70 and 61% (for [<sup>125</sup>I]**PRA5** and [<sup>125</sup>I]**PRA6**).

### Synthesis of **A13**

To a solution of 4-amino-1-butanol (1.0 g, 11 mmol) in anhydrous dichloromethane (20 mL), Boc<sub>2</sub>O (2.9 g, 13 mmol) and trimethylamine (3.3 g, 33 mmol) were added in portions, and the mixture was stirred for 1 h at room temperature. The reaction was quenched with water, extracted with dichloromethane and washed with saturated aqueous NH<sub>4</sub>Cl. The organic layer was dried over anhydrous MgSO<sub>4</sub>. After removal of the solvent, the crude product was purified by silica gel column chromatography (Wako gel<sup>®</sup> C-200, 5-10% MeOH/chloroform) to give **A13** as colorless oil (2.31 g, quant.); <sup>1</sup>H-NMR (400 MHz/CDCl<sub>3</sub>): δ 4.63 (br s, 1H), 3.66 (t, *J* = 5.8 Hz, 2H), 3.65 (q, *J* = 5.7 Hz, 2H), 1.60-1.55 (m, 4H), 1.43 (s, 9H); <sup>13</sup>C-NMR (100 MHz/CDCl<sub>3</sub>): δ 156.34, 79.52, 62.67, 40.51, 29.93, 28.62 (3C), 26.83; ESI-MS (*m/z*): 190.1 [M + H]<sup>+</sup>.

### Synthesis of **A14**

To a solution of **A13** (1.16 g, 5.5 mmol) in anhydrous dichloromethane (30 mL), triethylamine (650 mg, 6.5 mmol) and MsCl (744 mg, 6.5 mmol) were added carefully, and the mixture was stirred for 30 min at 0°C. The reaction was quenched with water, extracted with diethyl ether, and the organic layer was dried over anhydrous MgSO<sub>4</sub> to give **A14** as a yellow oil (1.55 g, crude); <sup>1</sup>H-NMR (400 MHz/CDCl<sub>3</sub>): δ 4.58 (brs, 1H), 4.24 (t, *J* = 6.3 Hz, 2H), 3.16 (q, *J* = 6.5 Hz, 2H), 3.00 (s, 3H), 1.81-1.74 (m, 2H), 1.64-1.56 (m, 2H); <sup>13</sup>C-NMR (100 MHz/CDCl<sub>3</sub>): δ 156.18, 79.52, 69.77, 39.97, 37.59, 28.59, 26.61, 26.49; ESI-MS (*m/z*): 268.1 [M + H]<sup>+</sup>.

### Synthesis of **A15**

The mixture of **A4** (1.26 g, 4.58 mmol) and ethyl formate (1.0 g, 14 mmol) was heated under reflux for 16 h. The mixture was concentrated under reduced pressure to give **A15** as yellow solid (1.45 g, crude); <sup>1</sup>H-NMR (400 MHz/CDCl<sub>3</sub>): δ 8.15 (s, 1H), 7.59 (dt, *J* = 8.3, 1.8 Hz, 2H), 6.93 (dt, *J* = 8.3, 1.8 Hz, 2H), 5.51 (br s, 1H), 3.31 (q, *J* = 6.6 Hz, 2H), 2.58 (t, *J* = 7.4 Hz, 2H), 1.67-1.60 (m, 2H), 1.59-1.54 (m, 2H); <sup>13</sup>C-NMR (100 MHz/CDCl<sub>3</sub>): δ 161.35, 141.76, 137.62 (2C), 130.73 (2C), 91.09, 38.10, 35.08, 29.24, 28.56; ESI-MS (*m/z*): 304.0 [M + H]<sup>+</sup>.

### Synthesis of **A16**

To a suspension of LiAlH<sub>4</sub> (261 mg, 6.87 mmol) in anhydrous THF (10 mL), **A15** (1.45 g) in THF (10 mL) was added, and the mixture was heated under reflux for 3 h. After being cooled to 0°C, the reaction was quenched with 2.0 M aqueous NaOH, then stirred for 30 min at room temperature. The mixture was filtered through a pad of Celite<sup>®</sup> and the filtrate was concentrated under reduced pressure to give **A16** as a yellow oil (1.06 g, crude); <sup>1</sup>H-NMR (400 MHz/CDCl<sub>3</sub>): δ 7.58 (dt, *J* = 8.3, 1.8 Hz, 2H), 6.92 (dt, *J* = 8.3, 1.8 Hz, 2H), 2.66-2.55 (m, 4H), 2.42 (s, 3H), 1.68-1.61 (m, 2H), 1.59-1.52 (m, 2H); ESI-MS (*m/z*): 290.0 [M + H]<sup>+</sup>.

### Synthesis of **A17**

To a solution **A14** (1.55 g) in acetonitrile (30 mL), **A16** (1.06 g) and  $K_2CO_3$  (1.52 g, 11.0 mmol) was added, and the mixture was heated under reflux for 16 h. The mixture was concentrated under reduced pressure and the residue was resuspended in dichloromethane, washed with water. The organic layer was dried over anhydrous  $MgSO_4$ , and the crude product was purified by silica gel column chromatography (Wako gel<sup>®</sup> C-200, 10% MeOH/chloroform) to give **A17**. The crude product was further purified by preparative HPLC (COSMOSIL 5C<sub>18</sub>-MS-II 20 mm x 250 mm, 80 % MeOH/water) to give pure **A17** as a colorless oil (267 mg, 0.560 mmol, 24%, 3 steps); <sup>1</sup>H-NMR (400 MHz/ $CDCl_3$ ):  $\delta$  7.58 (dt,  $J = 8.3, 1.8$  Hz, 2H), 6.92 (d,  $J = 8.3$  Hz, 2H), 5.04 (br s, 1H), 3.11 (d,  $J = 5.4$  Hz, 2H), 2.56 (t,  $J = 7.5$  Hz, 2H), 2.33-2.28 (m, 4H), 2.16 (s, 3H), 1.62-1.55 (m, 2H), 1.51-1.46 (m, 6H), 1.43 (s, 9H); <sup>13</sup>C-NMR (100 MHz/ $CDCl_3$ ):  $\delta$  156.27, 142.36, 137.50 (2C), 130.75 (2C), 90.84, 79.07, 57.82, 57.69, 42.21, 40.74, 35.55, 29.37, 28.67 (3C), 28.22, 27.05, 25.01; ESI-MS ( $m/z$ ): 461.2 [M + H]<sup>+</sup>.

### Synthesis of **A18**

To a solution of **A17** (136 mg, 0.295 mmol) in a mixture of EtOH (1.2 mL) and water (0.3 mL), *trans*-*N,N'*-dimethylcyclohectane-1,2-diamine (84 mg, 0.59 mmol),  $NaN_3$  (38 mg, 0.59 mmol), CuI (11 mg, 0.058 mmol), and sodium *L*-ascorbic acid (12 mg, 0.060 mmol) were added. The mixture was heated under reflux for 4 h, then quenched with water and extracted with ethyl acetate. The organic layer was dried over anhydrous  $MgSO_4$  and the crude product was purified by silica gel column chromatography (Wako gel<sup>®</sup> C-200, 10% MeOH/chloroform) to give **A18** as a brown oil (145 mg, crude); <sup>1</sup>H-NMR (400 MHz/ $CDCl_3$ ):  $\delta$  7.15 (d,  $J = 8.5$  Hz, 2H), 6.94 (dt,  $J = 8.5, 2.1$  Hz, 2H), 5.04 (br s, 1H), 3.11 (d,  $J = 5.2$  Hz, 2H), 2.60 (t,  $J = 7.5$  Hz, 2H), 2.36-2.32 (m, 4H), 2.18 (s, 3H), 1.61-1.56 (m, 2H), 1.51-1.49 (m, 6H), 1.43 (s, 9H); <sup>13</sup>C-NMR (100 MHz/ $CDCl_3$ ):  $\delta$  156.29, 139.52, 137.64, 129.91 (2C), 119.11 (2C), 57.78, 57.62, 42.14, 40.69, 35.39, 29.55, 28.66 (3C), 28.20, 26.91, 24.84; ESI-MS ( $m/z$ ): 376.3 [M+H]<sup>+</sup>.

### Synthesis of **A19**

To a solution of crude **A18** (145 mg) in dichloromethane (1.2 mL), TFA (0.8 mL) was added carefully. After stirring for 30 min at room temperature, the mixture was concentrated under reduced pressure. Then, the residue was resuspended in dichloromethane, washed 1.0 M aqueous NaOH, and the organic layer was dried over anhydrous  $MgSO_4$ . The removal of the solvent gave **A19** as a brown oil (108 mg, crude); <sup>1</sup>H-NMR (400 MHz/ $CDCl_3$ ):  $\delta$  7.14 (d,  $J = 8.4$  Hz, 2H), 6.92 (d,  $J = 8.4$  Hz, 2H), 2.70 (m, 2H), 2.59 (t,  $J = 7.5$  Hz, 2H), 2.34-2.29 (m, 4H), 2.18 (s, 3H), 1.62-1.55 (m, 2H), 1.49-1.46 (m, 6H); <sup>13</sup>C-NMR (100 MHz/ $CDCl_3$ ):  $\delta$  139.72, 137.98, 129.91 (2C), 119.08 (2C), 57.90, 57.77, 42.35, 42.25, 35.39, 31.77, 29.23, 27.02, 24.34; ESI-MS ( $m/z$ ): 276.2 [M+H]<sup>+</sup>.

### Synthesis of **A20**

**A20** was prepared from **A17** according to the same procedure described for **A19**, and the product was obtained as a yellow oil (98 mg, 0.27 mmol, 99%); <sup>1</sup>H-NMR (400 MHz/CDCl<sub>3</sub>): δ 7.56 (dt, *J* = 8.3, 2.0 Hz, 2H), 6.91 (d, *J* = 8.3 Hz, 2H), 2.68 (t, *J* = 6.6 Hz, 2H), 2.54 (t, *J* = 7.5 Hz, 2H), 2.32-2.27 (m, 4H), 2.16 (s, 3H), 1.61-1.52 (m, 2H), 1.49-1.40 (m, 6H); <sup>13</sup>C-NMR (100 MHz/CDCl<sub>3</sub>): δ 142.33, 137.43 (2C), 130.72 (2C), 90.79, 57.91, 57.75, 42.42, 42.35, 35.50, 31.96, 29.33, 27.07, 24.90; ESI-MS (*m/z*): 361.1 [M+H]<sup>+</sup>.

### Synthesis of **PRA5**

To a solution of **A8a** (119 mg, 0.295 mmol) in anhydrous DMF (2 mL), **A19** (108 mg, crude), 4-methylmorpholine (149 mg, 1.48 mmol), and HATU (168 mg, 0.442 mmol) was added sequentially. The mixture was stirred for 2 h at room temperature, and the reaction was quenched with 2.0 M aqueous NaOH, followed by the extraction with ethyl acetate. The organic layer was dried over anhydrous MgSO<sub>4</sub>, and the crude product was purified by silica gel column chromatography (Wako gel<sup>®</sup> C-200, 10% MeOH/chloroform) to afford **PRA5** as a yellow solid (46 mg, 0.069 mmol, 23%, 2 steps); <sup>1</sup>H-NMR (400 MHz/CDCl<sub>3</sub>): δ 7.67 (d, *J* = 8.3 Hz, 2H), 7.13 (d, *J* = 8.4 Hz, 2H), 7.07 (d, *J* = 8.3 Hz, 2H), 6.92 (d, *J* = 8.4 Hz, 2H), 5.67 (t, *J* = 5.8 Hz, 1H), 4.57 (d, *J* = 5.8 Hz, 2H), 3.37 (q, *J* = 5.8 Hz, 2H), 3.04-2.95 (m, 4H), 2.72 (s, 3H), 2.61 (t, *J* = 6.9 Hz, 2H), 1.76-1.72 (m, 4H), 1.66-1.63 (m, 4H); <sup>13</sup>C-NMR (100 MHz/CDCl<sub>3</sub>): δ 166.68, 154.03, 151.17, 139.64, 138.27, 137.98 (2C), 137.89, 129.90 (2C), 129.85 (2C), 119.63, 119.21 (2C), 113.16, 93.19, 56.52, 55.99, 44.79, 40.60, 37.64, 34.58, 28.26, 27.28, 23.74, 21.26; ESI-MS (*m/z*): 662.2 [M+H]<sup>+</sup>.

### Synthesis of **PRA6**

**PRA6** was prepared from **A8b** and **A20** according to the procedure described for **PRA5**. The crude product was purified by silica gel column chromatography (Wako gel<sup>®</sup> C-200, 5–20% MeOH/chloroform) to afford **PRA6** as a yellow solid (107 mg, 0.162 mmol, 60%); <sup>1</sup>H-NMR (400 MHz/CDCl<sub>3</sub>): δ 7.53 (d, *J* = 8.2 Hz, 2H), 7.30 (d, *J* = 8.5 Hz, 2H), 6.98 (dt, *J* = 8.5, 2.2 Hz, 2H), 6.88 (d, *J* = 8.2 Hz, 2H), 5.69 (t, *J* = 5.8 Hz, 1H), 4.57 (d, *J* = 5.8 Hz, 2H), 3.33 (q, *J* = 6.4 Hz, 2H), 3.05-2.97 (m, 4H), 2.73 (s, 3H), 2.54 (t, *J* = 7.4 Hz, 2H), 1.70-1.67 (m, 4H), 1.62-1.58 (m, 4H); <sup>13</sup>C-NMR (100 MHz/CDCl<sub>3</sub>): δ 166.82, 154.05, 151.19, 141.28, 139.62, 137.58 (2C), 134.82, 130.73 (2C), 129.48 (2C), 119.72, 119.50 (2C), 112.90, 91.20, 56.76, 56.24, 44.77, 40.93, 37.62, 34.75, 28.09, 27.32, 24.15, 21.56; ESI-MS (*m/z*): 662.2 [M+H]<sup>+</sup>.

### Synthesis of **A21a**

To a solution of **PRA5** (41 mg, 0.062 mmol) in anhydrous 1,4-dioxane (1.0 mL), tributyliditin (0.16 mL, 0.31 mmol), and Pd(PPh<sub>3</sub>)<sub>4</sub> (7.0 mg, 0.006 mmol) were added. After stirring for 8 h at 50°C, the mixture was

concentrated under reduced pressure. The residue was purified by silica gel column chromatography (Wako gel<sup>®</sup> C-200, 25% MeOH/chloroform) to afford crude **A21a** which was further purified by preparative HPLC (COSMOSIL 5C<sub>18</sub>-MS-II 20 mm x 250 mm, 85% MeOH/ 0.01% aqueous TFA) to give pure **A21a** as a yellow solid (9.0 mg, 0.011 mmol, 18%); <sup>1</sup>H-NMR (400 MHz/CDCl<sub>3</sub>): δ 7.46 (d, *J* = 7.9 Hz, 2H), 7.28 (d, *J* = 7.9 Hz, 2H), 7.13 (d, *J* = 8.4 Hz, 2H), 6.95 (d, *J* = 8.4 Hz, 2H), 5.64 (t, *J* = 5.6 Hz, 1H), 4.61 (d, *J* = 5.6 Hz, 2H), 3.43-3.38 (m, 2H), 3.13-2.92 (m, 4H), 2.74 (s, 3H), 2.62 (t, *J* = 7.3 Hz, 2H), 1.80-1.75 (m, 4H), 1.65-1.60 (m, 4H), 1.57-1.50 (m, 6H), 1.37-1.28 (m, 6H), 1.34-0.96 (m, 6H), 0.88 (t, *J* = 7.3 Hz, 9H); <sup>13</sup>C-NMR (100 MHz/CDCl<sub>3</sub>): δ 166.72, 154.15, 151.34, 141.85, 138.20, 138.02, 137.58, 137.14 (2C), 129.87 (2C), 127.51 (2C), 119.72, 119.36 (2C), 113.15, 55.70, 55.36, 45.49, 39.82, 37.76, 34.69, 29.29 (3C), 28.52, 27.58 (3C), 27.46, 23.36, 20.95, 13.88 (3C), 9.81 (3C); ESI-MS (*m/z*): 826.4 [M+H]<sup>+</sup>.

#### *Synthesis of A21b*

**A21b** was prepared from **PRA6** according to the procedure described for **A21a**. The crude product was purified by silica gel column chromatography (Wako gel<sup>®</sup> C-200, 2-5% MeOH/chloroform) to give crude **30**, which was further purification by preparative HPLC (COSMOSIL 5C<sub>18</sub>-MS-II, 20 mm x 250 mm, 85% MeOH/0.01% aqueous TFA) to give pure **A21b** as a yellow solid (11 mg, 0.013 mmol, 17%); <sup>1</sup>H-NMR (400 MHz/CDCl<sub>3</sub>): δ 7.37 (d, *J* = 7.9 Hz, 2H), 7.31 (d, *J* = 8.5 Hz, 2H), 7.10 (d, *J* = 7.9 Hz, 2H), 7.01 (dt, *J* = 8.5, 2.2 Hz, 2H), 5.64 (t, *J* = 5.7 Hz, 1H), 4.60 (d, *J* = 5.8 Hz, 2H), 3.41-3.37 (m, 2H), 3.11-2.92 (m, 4H), 2.73 (s, 3H), 2.61 (t, *J* = 7.4 Hz, 2H), 1.80-1.76 (m, 4H), 1.67-1.59 (m, 4H), 1.57-1.49 (m, 6H), 1.38-1.28 (m, 6H), 1.14-0.99 (m, 6H), 0.88 (t, *J* = 7.3 Hz, 9H); <sup>13</sup>C-NMR (100 MHz/CDCl<sub>3</sub>): δ 166.49, 154.06, 151.18, 140.90, 139.76, 139.43, 136.87 (2C), 134.84, 129.43 (2C), 128.74, 128.23 (2C), 119.57 (2C), 113.44, 55.73, 55.37, 44.83, 39.77, 37.81, 35.31, 29.30 (3C), 28.47, 27.58 (3C), 27.44, 23.38, 21.05, 13.88 (3C), 9.76 (3C); ESI-MS (*m/z*): 826.4 [M+H]<sup>+</sup>.

#### *Synthesis of [<sup>125</sup>I]PRA5*

[<sup>125</sup>I]PRA5 was prepared from **A21a** according to the procedure described for [<sup>125</sup>I]PRA3. The radiochemical yield of [<sup>125</sup>I]PRA5 from the initial [<sup>125</sup>I]NaI was 70%. The radiochemical purity and the specific activity were >99% and 2,000 Ci/mmol, respectively (judged from HPLC and radio-TLC). [<sup>125</sup>I]PRA5 was stored as an ethanoic solution (1 mCi/mL) at 4°C.

#### *Synthesis of [<sup>125</sup>I]PRA6*

[<sup>125</sup>I]PRA6 was prepared from **A21b** according to the procedure described for [<sup>125</sup>I]PRA3. The radiochemical yield of [<sup>125</sup>I]PRA6 from the initial [<sup>125</sup>I]NaI was 61%. The radiochemical purity and the specific activity were >99% and 2,000 Ci/mmol, respectively (judged from HPLC and radio-TLC). [<sup>125</sup>I]PRA6 was stored as an ethanoic solution (1 mCi/mL) at 4°C.

## References (for synthetic procedures)

1. Knoevenagel, E (1898) *Ber. Deutsch. Chem. Ges.* 1898, 31, 2596.
2. Okuda, K., Murai, M., Aburaya, S., Aoki, W., and Miyoshi, H. (2016) *Biochemistry* 55, 470-481.
3. Masuya, T., Okuda, K., Murai, M., and Miyoshi, H. (2016) *Biosci. Biotechnol. Biochem.* 80, 1464-1469.
4. Sonogashira, K. Tohda, Y., and Hagiwara, N. (1975) *Tetrahedron Lett.* 50, 4467.
5. van der Klei, A., de Jong, R. L. P., Lugtenburg, J., and Tielens, A. G. M. (2002) *Eur. J. Org. Chem.* 2002, 3015-3023.
6. Hay, A. S. (1962) *J. Org. Chem.* 27, 3320-3321.
7. Ito, T., Murai, M., Ninokura, S., Kitazumi, Y., Mezic, K. G., Cress, B. F., Koffas, M. A. G., Morgan, J. E., Barquera, B., and Miyoshi, H. (2017) *J. Biol. Chem.* 292, 7727-7742.
8. Hamprecht, D., Hechel, A., and Kley, J. (2014) WO 2014044849.
9. Hirsh, A. J., Molino, B. F., Zhang, J. Astakhova, N., Geiss, W. B. Sargent, B. J., Swenson, B. D., Usyatinsky, A. Wyle, M. J., Boucher, R. C., Smith, R. T., Zamurs, A., and Johnson, M. R. (2006) *J. Med. Chem.* 49, 4098-4115.
10. Murai, M., Habu, S., Murakami, S., Ito, T., and Miyoshi, H. (2015) *Biosci. Biotechnol. Biochem.* 79, 1061-1066.
11. Ito, T., Murai, M., Morisaka, H., and Miyoshi, H. (2015) *Biochemistry* 54, 3677-3686.



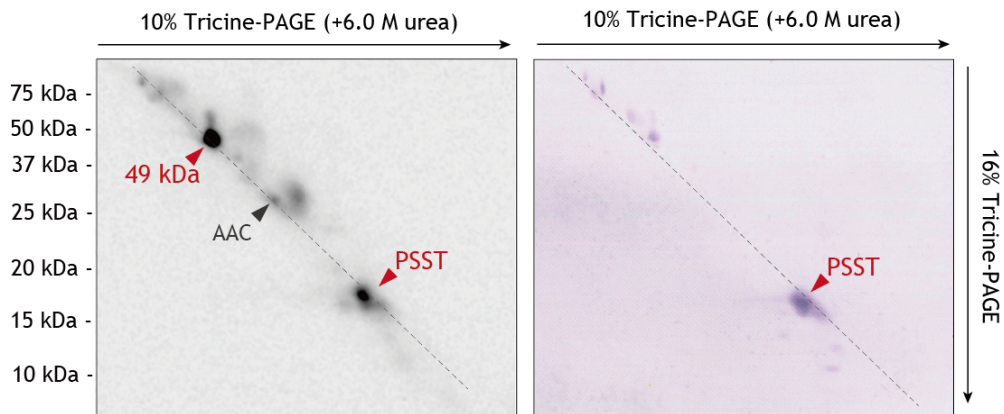

### Figure S1

Detection of the PSST subunit on the doubled-SDS gel. (A) SMPs (4.0 mg of proteins/mL) were labeled by [<sup>125</sup>I]PRA8 (10 nM), and the complex I was isolated by BN-PAGE and electroelution. The complex I labeled by [<sup>125</sup>I]PRA8 was separated on a first dimensional 10% Schagger-type SDS gel (10% T, 3% C, containing 6.0 M urea) followed by a second dimensional separation on a 16% Schagger-type SDS gel (16% T, 3% C). The SDS gel was subjected to autoradiography. The autoradiogram was identical to that used in Figure 7C. (B) The migration pattern of the PSST subunit on the 2D gel was also profiled by Western blotting using anti-*Paracoccus* Nqo6 antibody (PSST homologue, a kind gift from Dr. Takao Yagi).

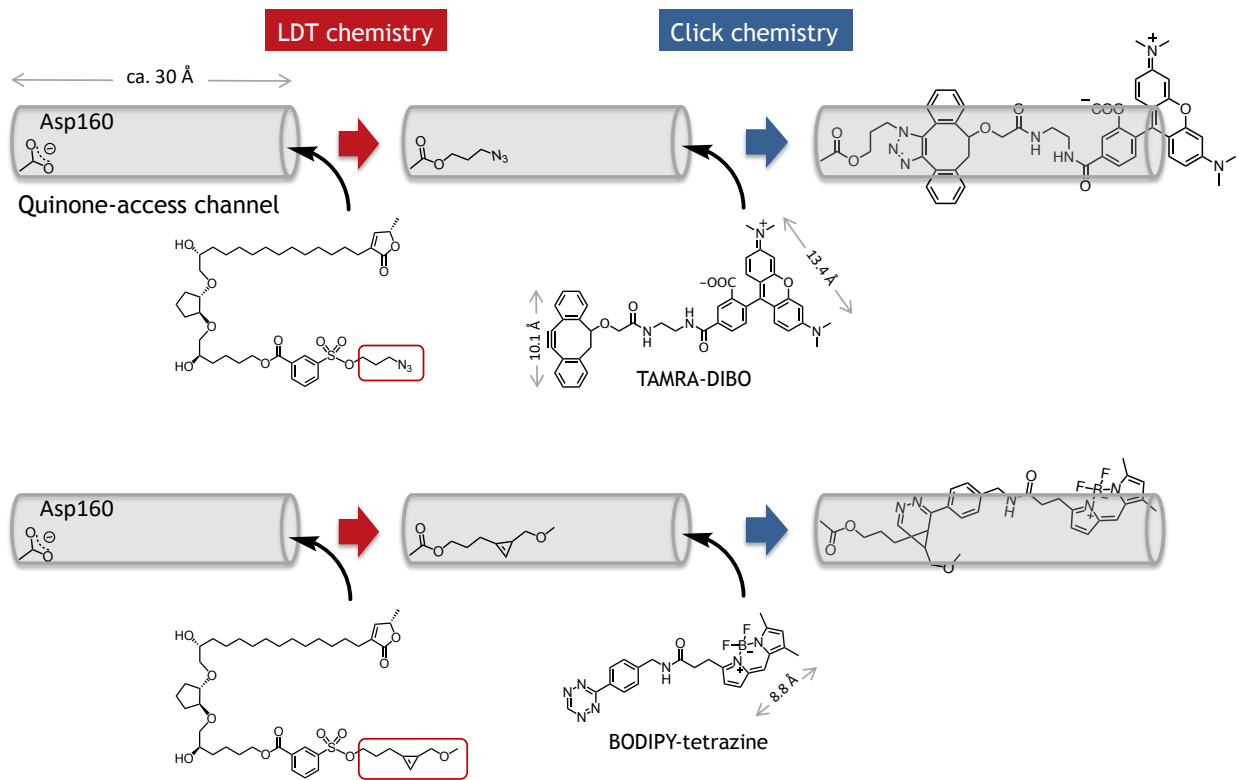

**Figure S2**

Schematic diagram of the pinpoint chemical modification of the 49 kDa Asp160. The 49 kDa Asp160 can be modified by externally added bulky tags such as TAMRA-DIBO and BODIPY-tetrazine through the two-step conjugation procedure (LDT and click chemistry) (refs. 15 and 18).

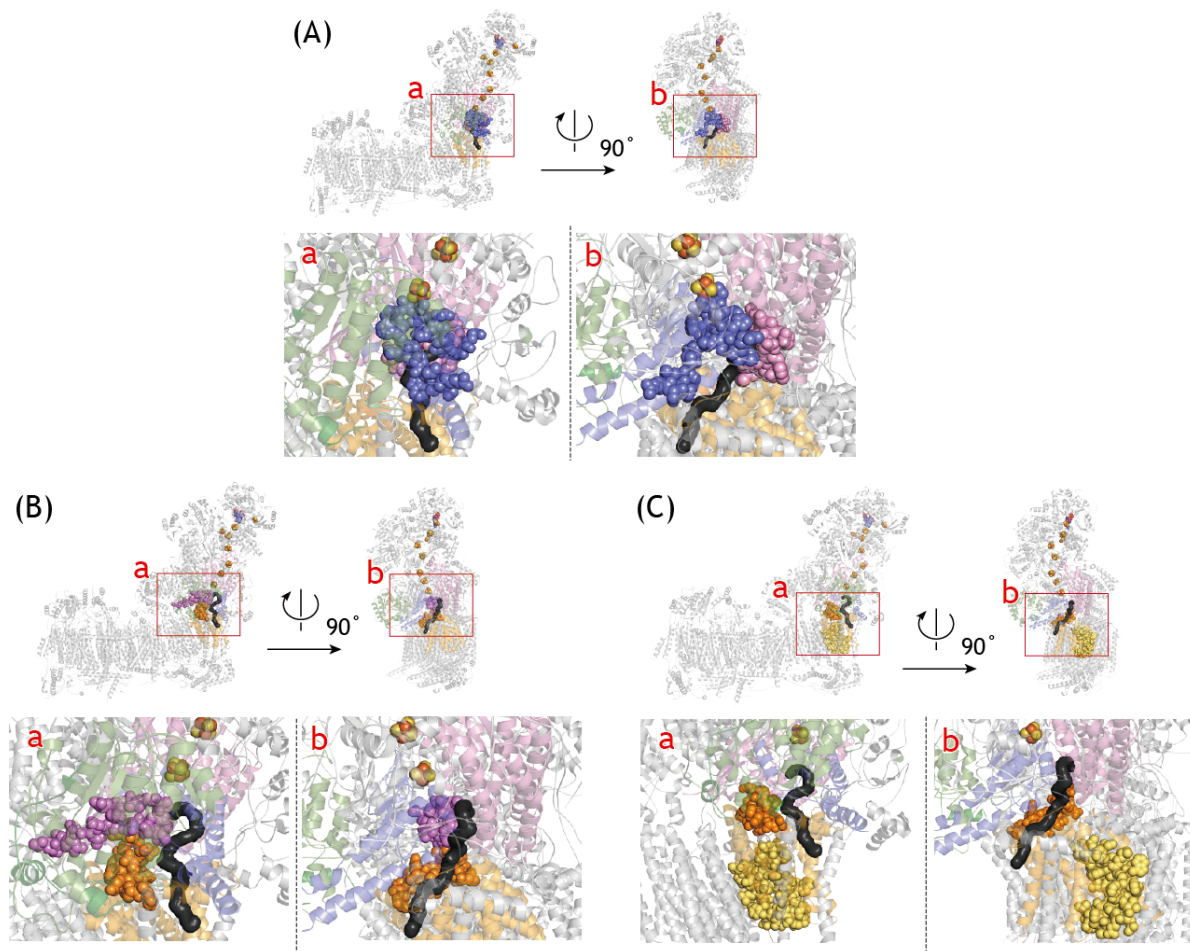

### Figure S3

Summary of photoaffinity labeling studies using different quinone-site inhibitors. The regions labeled by photoreactive inhibitors are shown by *spheres* in ovine complex I (PDB entry 5LNK, ref. 9). The quinone/inhibitor-access channel in the current models is shown in *black*. (A) The region labeled by photoreactive fenpyroximate analogs ( $[^{125}\text{I}]\text{APF}$  and  $[^{125}\text{I}]\text{AIF}$ ): the interface between the PSST (Ser43–Arg66) and 49 kDa (Asp160–Arg174) are shown in *blue* and *pink* spheres, respectively. (B) The region labeled by a photoreactive quinazoline ( $[^{125}\text{I}]\text{AzQ}$ ): the interface between the *N*-terminal region (Val44–Arg63) in 49 kDa and the matrix side loop connecting the TMH5-6 (Thr201–Ala217) in ND1 are shown in *pink* and *orange* spheres, respectively. (C) The region labeled by photoreactive acetogenin analogs ( $[^{125}\text{I}]\text{TDA}$  and  $[^{125}\text{I}]\text{DANA}$ ): the loop connecting the TMH5-6 and the region spanning TMH4-5 (Val144–Glu192) are shown in *orange* and *yellow* spheres, respectively.

**Table S1. Proteins identified by MALDI-TOF MS**

| Protein name<br>(Swiss Prot<br>accession<br>No.) | Matched<br>peptides | MOWSE<br>score <sup>a</sup><br>(Sequence<br>coverage) | Matched in-gel triptic digests            |           |            |                             |          |
|--------------------------------------------------|---------------------|-------------------------------------------------------|-------------------------------------------|-----------|------------|-----------------------------|----------|
|                                                  |                     |                                                       | Observed<br><i>m/z</i> (MH <sup>+</sup> ) | Mr        |            | Peptide sequence            | Residues |
|                                                  |                     |                                                       |                                           | Expected  | Calculated |                             |          |
| Complex I-<br>49 kDa<br>subunit<br>(P17694)      | 17                  | 105<br>(43%)                                          | 2014.085                                  | 2013.0777 | 2012.9745  | ETAHWKPPPWNVDVDPK           | 24-40    |
|                                                  |                     |                                                       | 2457.451                                  | 2456.4437 | 2456.2924  | DTLVSNLTLNFGPQHPAAHGVLR     | 41-63    |
|                                                  |                     |                                                       | 1263.737                                  | 1262.7297 | 1262.6363  | LVMELSGEMVR                 | 64-74    |
|                                                  |                     |                                                       | 1279.731                                  | 1278.7237 | 1278.6312  | LVMELSGEMVR + Oxidation (M) | 64-74    |
|                                                  |                     |                                                       | 1217.728                                  | 1216.7207 | 1216.6135  | CDPHIGLLHR                  | 76-85    |
|                                                  |                     |                                                       | 2033.13                                   | 2032.1227 | 2032.0669  | LIEYKTYLQALPYFDR            | 90-105   |
|                                                  |                     |                                                       | 1386.803                                  | 1385.7957 | 1385.6979  | TYLQALPYFDR                 | 90-105   |
|                                                  |                     |                                                       | 934.607                                   | 933.5997  | 933.5284   | VLFGEITR                    | 139-146  |
|                                                  |                     |                                                       | 1021.517                                  | 1020.5097 | 1020.4375  | MFEFYER                     | 177-183  |
|                                                  |                     |                                                       | 1037.509                                  | 1036.5017 | 1036.4324  | MFEFYER + Oxidation (M)     | 177-183  |
|                                                  |                     |                                                       | 1476.814                                  | 1475.8067 | 1475.6926  | IDELEEMLTNNR                | 222-233  |
|                                                  |                     |                                                       | 2441.399                                  | 2440.3917 | 2440.2308  | TVDIGIVTAEDALNYGFSGVMLR     | 239-261  |
|                                                  |                     |                                                       | 1031.604                                  | 1030.5967 | 1030.5196  | GSGIQWDLR                   | 262-270  |
|                                                  |                     |                                                       | 2228.195                                  | 2227.1877 | 2227.0433  | TQPYDVYDQVEFDVPIGSR         | 272-290  |
|                                                  |                     |                                                       | 1789.058                                  | 1788.0507 | 1787.8698  | AEMKTSMESLIHHFK             | 336-350  |
| 2269.261                                         | 2268.2537           | 2268.1314                                             | LYTEGYQVPPGATYTAIEAPK                     | 351-371   |            |                             |          |
| 1196.723                                         | 1195.7157           | 1195.6349                                             | APGFAHLAGLDK                              | 393-404   |            |                             |          |
| Complex I-<br>39 kDa<br>subunit<br>(P34943)      | 13                  | 103<br>(45%)                                          | 1826.095                                  | 1825.0877 | 1824.9734  | SSVSGIVATVFGATGFLGR         | 14-32    |
|                                                  |                     |                                                       | 957.589                                   | 956.5817  | 956.5192   | YVVNHLGR                    | 33-40    |
|                                                  |                     |                                                       | 1479.922                                  | 1478.9147 | 1478.8205  | AVEHSSVINLVGR               | 84-97    |
|                                                  |                     |                                                       | 1932.987                                  | 1931.9797 | 1931.8578  | EWETQNFDVDFVVK              | 98-112   |
|                                                  |                     |                                                       | 1407.854                                  | 1406.8467 | 1406.767   | FIHISHLNADIK                | 129-140  |
|                                                  |                     |                                                       | 1919.148                                  | 1918.1407 | 1918.02    | ETFPEATIHKPAEIFGR           | 158-174  |
|                                                  |                     |                                                       | 1157.682                                  | 1156.6747 | 1156.6029  | FLNYFANIR                   | 178-186  |
|                                                  |                     |                                                       | 1273.797                                  | 1272.7897 | 1272.7231  | WFGGVPLISLGK                | 187-198  |
|                                                  |                     |                                                       | 1282.789                                  | 1281.7817 | 1281.7041  | GIINAIKDPDAR                | 213-224  |
|                                                  |                     |                                                       | 981.574                                   | 980.5667  | 980.508    | TFAFVGPSR                   | 227-235  |
|                                                  |                     |                                                       | 1622.923                                  | 1621.9157 | 1621.814   | LFEISPFEPWTR                | 269-281  |
|                                                  |                     |                                                       | 2254.414                                  | 2253.4067 | 2253.262   | ILPHLPGLLEDLGEATPLELK       | 293-313  |
|                                                  |                     |                                                       | 1501.849                                  | 1500.8417 | 1500.746   | WLSSEIEDVQPAK               | 326-338  |

**Table S1 (continued)**

| Protein name<br>(Swiss Prot<br>accession<br>No.) | Matched<br>peptides | MOWSE<br>score <sup>a</sup><br>(Sequence<br>coverage) | Matched in-gel triptic digests            |           |            |                            |          |
|--------------------------------------------------|---------------------|-------------------------------------------------------|-------------------------------------------|-----------|------------|----------------------------|----------|
|                                                  |                     |                                                       | Observed<br><i>m/z</i> (MH <sup>+</sup> ) | Mr        |            | Peptide sequence           | Residues |
|                                                  |                     |                                                       |                                           | Expected  | Calculated |                            |          |
| Complex I-<br>PSST<br>subunit<br>(P42026)        | 14                  | 69<br>(23%)                                           | 1115.603                                  | 1114.5957 | 1114.5771  | K.LDDLINWAR                | 33-41    |
|                                                  |                     |                                                       | 715.285                                   | 714.2777  | 714.2643   | YDMDR + Oxidation (M)      | 67-71    |
|                                                  |                     |                                                       | 430.264                                   | 429.2567  | 429.2336   | ASPR                       | 78-81    |
|                                                  |                     |                                                       | 658.376                                   | 657.3687  | 657.3632   | MAPALR                     | 96-101   |
|                                                  |                     |                                                       | 674.37                                    | 673.3627  | 673.3581   | MAPALR + Oxidation (M)     | 96-101   |
|                                                  |                     |                                                       | 1262.641                                  | 1261.6337 | 1261.6125  | KVYDQMPEPR                 | 102-111  |
|                                                  |                     |                                                       | 1278.636                                  | 1277.6287 | 1277.6074  | KVYDQMPEPR + Oxidation (M) | 102-111  |
|                                                  |                     |                                                       | 1134.547                                  | 1133.5397 | 1133.5175  | VYDQMPEPR                  | 103-111  |
|                                                  |                     |                                                       | 1150.534                                  | 1149.5267 | 1149.5125  | VYDQMPEPR + Oxidation (M)  | 103-111  |
|                                                  |                     |                                                       | 507.231                                   | 506.2237  | 506.1907   | GCDR                       | 135-138  |
|                                                  |                     |                                                       | 416.351                                   | 415.3437  | 415.2907   | IKR                        | 167-169  |
|                                                  |                     |                                                       | 432.269                                   | 431.2617  | 431.2492   | EKR                        | 170-172  |
|                                                  |                     |                                                       | 444.359                                   | 443.3517  | 443.2968   | RLR                        | 172-174  |
|                                                  |                     |                                                       | 637.362                                   | 636.3547  | 636.3384   | IWYR                       | 175-178  |
| Complex I-<br>ND1 subunit<br>(P03887)            | 7                   | 51<br>(15%)                                           | 979.544                                   | 978.5367  | 978.5321   | VLGYMQLR                   | 27-34    |
|                                                  |                     |                                                       | 1107.639                                  | 1106.6320 | 1106.6270  | VLGYMQLRK                  | 27-35    |
|                                                  |                     |                                                       | 2050.167                                  | 2049.1601 | 2049.1622  | KGPNVVGYPYGLLQPIADAIAIK    | 35-54    |
|                                                  |                     |                                                       | 1922.077                                  | 1921.0701 | 1921.0673  | GPNVVGPYGLLQPIADAIAIK      | 36-54    |
|                                                  |                     |                                                       | 876.526                                   | 875.5187  | 875.5229   | YALIGALR                   | 127-134  |
|                                                  |                     |                                                       | 1649.860                                  | 1648.8535 | 1648.8548  | FRYDQLMHLLWK               | 280-291  |
| 1346.698                                         | 1345.6908           | 1345.6853                                             | YDQLMHLLWK                                | 282-291   |            |                            |          |

<sup>a</sup>MOWSE score is  $-10 \cdot \log P$ , where P is the probability that the observed match is a random event. Scores greater than 54 are significant ( $p < 0.05$ ).
